# Supplementary material for: Cost-effectiveness Analysis of Nutrition Facts Added-Sugar Labeling and Obesity-Associated Cancer Rates in the US
Source: PubMed Central journal article supplement (PMC8080223; doi:10.1001/jamanetworkopen.2021.7501), 2021-04-27
Supplement: jamanetwopen-e217501-s001.pdf [file jamanetwopen-e217501-s001.pdf]

## Supplementary Online Content

Du M, Griecci CF, Cudhea FF, et al; Food-PRICE Project. Cost-effectiveness analysis of nutrition facts added-sugar labeling and obesity-associated cancer rates in the US. *JAMA Network Open*. 2021;4(4):e217501. doi:10.1001/jamanetworkopen.2021.7501

**eAppendix 1.** Baseline Cancer Incidence and Methods of Cancer Incidence Projections for 13 Types of Cancer

**eAppendix 2.** Cancer Survival for 13 Types of Cancer

**eTable 1.** Period Method for Five-Year Relative Survival for 2014

**eAppendix 3.** Methods of Estimating the Health-Related Quality of Life Among 13 Types of Cancer

**eAppendix 4.** Estimate the Association Between Added Sugar Labeling Policy and Added Sugar Intake

**eAppendix 5.** Methods of Estimating Policy Implementation Costs

**eTable 2.** Implementation Cost Estimates for the Nutrition Facts Added Sugar Labeling Policy (in 2015 US Dollars)

**eTable 3.** Discounting Factor in Each Year Over a Lifetime

**eTable 4.** Population Size of People Who are Alive in Each Year Over a Lifetime (in Millions)

**eAppendix 6.** Annual Health-Related Costs Among Cancer Patients and the General Population Without Cancer

**eTable 5.** Description of Data Source of Health-Related Expenditures

**eTable 6.** Defining Population and 32 Subgroups

**eTable 7.** Characteristics of US Adults Aged 20 Years or Older Participated in the NHANES, 2013-2016

**eTable 8.** Consumption of Added Sugar From Foods and Beverages Among US Adults Participated in 2013-2016 NHANES, by 32 Subgroups

**eTable 9.** Relative Risk Estimates of Etiologic Relationships Between Body Mass Index (BMI) and Cancer

**eTable 10.** Health-Related Quality of Life Among US Cancer Patients Aged 20 Years or Older, by Cancer Type and Phase of Care

**eTable 11.** Baseline Medical Costs, Productivity Loss, and Patient Time Costs Among US Cancer Patients Aged 20 Years or Older, by Cancer Type

**eTable 12.** Baseline Medical Costs, Productivity Loss, and Patient Time Costs Among the General Population Aged 20 Years or Older in the US, by 32 Subgroups

**eTable 13.** Estimated Changes in Health-Related Costs Associated With Nutrition Facts Added Sugar Labeling on Reducing Cancer Burdens in the US Over a Lifetime, by Cancer Type

**eTable 14.** Estimated New Cancer Cases Averted by Nutrition Facts Added Sugar Labeling Policy in the US by Age, Gender, Race/Ethnicity, and Cancer Type Over a Lifetime

**eTable 15.** Estimated Cancer Deaths Reduced by Nutrition Facts Added Sugar Labeling Policy in the US by Age, Gender, Race/Ethnicity, and Cancer Type Over a Lifetime

**eTable 16.** Estimated Health Gains and Costs Associated With Nutrition Facts Added Sugar Labeling on Reducing Cancer Burdens in the US Over 10 Years

**eTable 17.** Estimated Health Gains and Costs Associated With Nutrition Facts Added Sugar Labeling on Reducing Cancer Burdens in the US Over a Lifetime, One-Way Sensitivity Analyses at 50% of the Policy Impact and the Diet-BMI Association

**eTable 18.** Estimated Health Gains and Costs Associated With Nutrition Facts Added Sugar Labeling on Reducing Cancer Burdens in the US Over a Lifetime, Threshold Analyses on Policy Impact

**eFigure 1.** Diet and Cancer Outcome Model (DiCOM)

**eFigure 2.** Estimated Reduced New Cancer Cases and Deaths Associated With Nutrition Facts added Sugar Labeling Policy in the US by Age, Gender, Race/Ethnicity, and Cancer Type Over a Lifetime

**eFigure 3.** Estimated Life Years and QALYs Gained Associated With Nutrition Facts Added Sugar Labeling Policy in the US by Age, Gender, and Race/Ethnicity Over a Lifetime

**eFigure 4.** Estimated Changes of Health-Related Costs Associated With Nutrition Facts Added Sugar Labeling Policy in the US by Age, Gender, Race/Ethnicity and Cancer Type Over a Lifetime

**eFigure 5.** Estimated Net Costs From Societal and Healthcare Perspectives Associated With Nutrition Facts Added Sugar Labeling Policy in the US by Age, Gender, and Race/Ethnicity Over a Lifetime

**eFigure 6.** One-Way Sensitivity Analysis of Net Costs of Nutrition Facts Added Sugar Label and Obesity-Associated Cancer Rates to Varying Assumptions of Key Input Parameters From (A) Societal Perspective and (B) Healthcare Perspective

**eReferences**

This supplementary material has been provided by the authors to give readers additional information about their work.

## **eAppendix 1. Baseline cancer incidence and methods of cancer incidence projections for 13 types of cancer**

We estimated the cancer incidence rate projections for the defined 32 demographic subgroups as inputs for the DiCOM model. We obtained age adjusted incidence rates, then projected rates based on historical trends, and then applied a cohort period age shifting method to calculate incidence rates for each of 32 subgroups over their lifetime.

We first obtained age-adjusted incidence rates for each year (2006-2015) from the United States Cancer Statistics which combines data from the Surveillance, Epidemiology, and End Results (SEER) database and the Centers for Disease Control and Prevention's National Program of Cancer Registries (NPCR) database.<sup>1</sup> An age-adjusted rate is a weighted average of the age-specific rates, where the weights are the proportions of persons in the corresponding age groups of a standard population. The potential confounding effect of age is reduced when comparing age-adjusted rates computed using the same standard population.

We then projected age-adjusted cancer incidence based on historical trends. We used the incidence data estimated from the most recent 10 years, 2006-2015, to predict the future 15 years, 2016-2030 and then held the incidence rate constant for all subsequent years.<sup>2</sup> To do so, we estimated the average annual percent change (AAPC) using age-adjusted incidence rates from 2006 to 2015, then applied it to the 2015 baseline incidence to project future incidence for each cancer type by subgroup.<sup>3</sup> The estimated annual percent change was calculated for each cancer site and 32 subgroups by fitting a regression line to the natural logarithm of the age-adjusted rates ( $I$ ) in years 2006 through 2015 ( $y$ ). The equation for AAPC:  $\ln(I) = \alpha + \beta y$ , where  $\alpha$  and  $\beta$  were coefficients to be estimated and  $y$  is calendar year.<sup>2,3</sup> The average annual percent change (AAPC) is a summary measure of the trend over a pre-specified fixed interval. It allows us to use a single number to describe the average APCs over a period of multiple years. It is valid even if the model indicates that there were changes in trends during those years. It is computed as a weighted average of the APCs, with the weights equal to the length of the APC interval.

We combined the AAPC projected incidence rates with the projected US population data and apply the cohort-period method to estimate the "crude" projected cancer incidence in each of the 32 subgroups from 2016 and 2095 incidence rates that will be used in the DiCOM model. US population estimates by single year of age, race/ethnicity, and sex will be extracted from the National Interim Projections of the US population via the US Census Bureau website. The projections series use the official estimates of the resident population on July 1, 2016 as the base for projecting the U.S. population from 2017 to 2060.<sup>4</sup> The series use the cohort-component method and historical trends in births, deaths, and international migration to project the future size and composition of the national population.

We have made two assumptions about this incidence rate. The population projection data are through year 2060 so we will assume incidence rates to be constant from year 2060 onward. We also assumed the population dies once they hit 100 years old and the model will then apply an incidence rate of 0 for any remaining years through year 2095. The DiCOM model will take into account the second assumption that death occurs at 100 years old.

## eAppendix 2. Cancer survival for 13 types of cancer

We estimated the 5-year relative survival for the defined 32 demographic subgroups. We obtained five-year relative survival rates using the period analysis method from the United States Cancer Statistics which incorporates data from the Surveillance, Epidemiology, and End Results (SEER) database.<sup>1</sup> The five-year survival for 2014, which was the most recent available data at time of analysis, was used. These rates were extracted for each cancer type and by the defined 32 demographic subgroups for each cancer type. The rates will be on a scale 0-1.

Relative survival is a net survival measure representing cancer survival in the absence of other causes of death. Relative survival is defined as the ratio of the proportion of observed survivors in a cohort of cancer patients to the proportion of expected survivors in a comparable set of cancer free individuals.<sup>5</sup> Relative survival is the preferred method to estimate survival from cancer registry data.

Period analysis is a method which enhances up-to-date monitoring of survival.<sup>6,7</sup> In contrast to traditional cohort analysis of survival, period analysis derives long-term survival estimates exclusively from the survival experience of patients within some recent calendar period.<sup>6,7</sup> Three-year intervals were chosen which results in years 2008-2014 used to calculate 5-year survival. Using seven years of data to calculate 5-year survival is standard method used by SEER and used in SEER publications.<sup>8</sup>

The first interval will contribute to the one year survival and will use cases diagnosed in 2012-2014, the second interval will contribute to the two year survival and will use cases diagnosed in 2011-2013, the third interval will contribute to the three year survival and will use cases diagnosed in 2010-2012, the fourth interval will contribute to the four year survival and will use cases diagnosed in 2009-2011 and the fifth interval will contribute to the five year survival and will use cases diagnosed in 2008-2010.

This analysis therefore used 2008-2014 diagnoses to calculate for 5-year relative survival for 2014. The highlighted orange boxes represent survival contributions for each year of diagnosis and year of follow-up (e**Table 1**). The annual probability of death was calculated as  $1 - \exp[\ln(5\text{-year relative survival})/5]$ .

**eTable 1. Period method for five-year relative survival for 2014**

| YEARS OF DIAGNOSIS |      |      |      |      |      |      |      |      |      |      |      |      |      |      |      |
|--------------------|------|------|------|------|------|------|------|------|------|------|------|------|------|------|------|
|                    | 2000 | 2001 | 2002 | 2003 | 2004 | 2005 | 2006 | 2007 | 2008 | 2009 | 2010 | 2011 | 2012 | 2013 | 2014 |
| 1                  |      |      |      |      |      |      |      |      |      |      |      |      |      |      |      |
| 2                  |      |      |      |      |      |      |      |      |      |      |      |      |      |      |      |
| 3                  |      |      |      |      |      |      |      |      |      |      |      |      |      |      |      |
| 4                  |      |      |      |      |      |      |      |      |      |      |      |      |      |      |      |
| 5                  |      |      |      |      |      |      |      |      |      |      |      |      |      |      |      |

### **eAppendix 3. Methods of estimating health related quality of life among 13 types of cancer**

Health utility values range from 0 (dead) to 1 (perfect health) and were assigned for each cancer type and by phase of care (initial, continuous, end of life), if available. We first searched databases for systematic reviews pertaining to utility weights or HRQOL measures for each cancer type of interest separately. We started with PubMed and searched Google Scholar if needed. The following search string was used for each cancer type: ("health related quality of life" OR "HRQOL" OR "quality of life" OR "QOL" OR "preference weight\*" OR "utility weight\*" OR "health state utilit\*" OR "health utility\*") AND ("cancer of interest") AND ("cancer" OR "neoplasm\*") AND ("review" OR "systematic review").

When an appropriate systematic review was identified, we read the articles included in the review and determined if the paper met the following data needs. Data Extraction Hierarchy: 1) cancer type specific to the type of interest; 2) consistent in instrument used, prefer EQ-5D whenever available; 3) US samples preferred; 4) phase of care (assume same utility weights by phase if phase of care data were not available). If no systematic reviews available, we searched for individual studies about the utility weights of the cancer of interest. Additionally, check how often the paper is cited to see if it is a frequently used utility weight.

## eAppendix 4. Estimate the association between added sugar labeling policy and added sugar intake

In order to understand the impact of the Nutrition Facts added sugar labeling policy, we must understand how both consumers and industry will respond to the policy as illustrated by the logical framework.

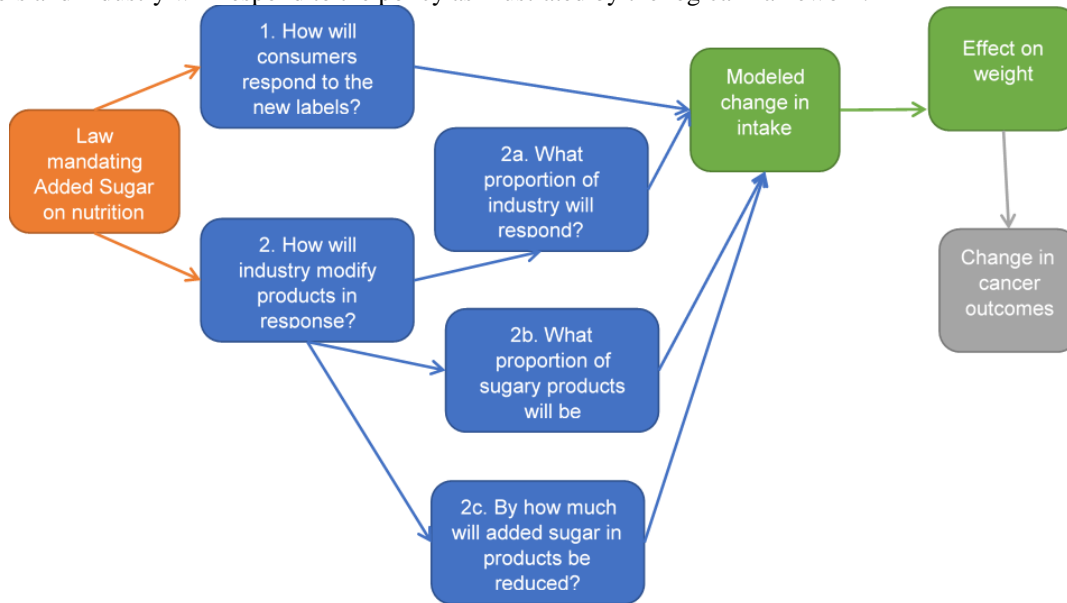

Because there is no much literature on the impact of added sugar labeling specifically, some assumptions must be made using the best available evidence from a mixture of sources. In Huang et al., the authors used the association estimate of calorie labeling, a reduction of intake by 6.6% (95% CI: 4.4% to 8.8%), as a proxy for added sugar labeling impact.<sup>9,10</sup> This policy impact estimate was chosen to represent a more conservative estimate than the larger impact observed from labeling on other dietary constituents such as sodium and *trans fat*.<sup>9</sup> This impact on consumer behavior alone was assumed to take effect during the first year of implementation and no further reduction thereafter. For industry reformulation, Huang et al. assumed no reformulation in the first year of labeling implementation, then 8.25% (95% CI: 7.5% to 9.0%) of the sugar-containing products would be reformulated each of years 2 to 5 during the intervention period to achieve 25% reduction in added sugar content in these products, with no additional reformulation thereafter.<sup>10-12</sup> In sum, this represents an  $8.25\% \times 4 \text{ years} \times 25\% = 8.25\%$  net reduction in added sugar amounts of U.S. sugar-containing products over the intervention period.<sup>10</sup>

## **eAppendix 5. Methods of estimating policy implementation costs**

We estimated the costs of implementing the Nutrition Facts added sugar labeling for both government and industry, including government administration cost, monitoring and evaluation costs, industry compliance costs and reformulation costs, based on FDA's budget report,<sup>13</sup> the Nutrition Review Project report,<sup>14</sup> and FDA's RIA<sup>11</sup> (**eTable 2**).

**eTable 2. Implementation cost estimates for the Nutrition Facts added sugar labeling policy (in 2015 US dollars)**

| Policy Impact           | Cost Category                                        | One-time Cost <sup>a</sup>                            | Annual Cost <sup>a</sup>                                                             | Source                                       |
|-------------------------|------------------------------------------------------|-------------------------------------------------------|--------------------------------------------------------------------------------------|----------------------------------------------|
| Consumer behavior alone | 1. Government administration <sup>b</sup>            | \$4,536,810<br>(\$3,629,448 to \$5,444,172)           | N/A                                                                                  | FDA's budget report <sup>1</sup>             |
|                         | 2. Government monitoring and evaluation <sup>b</sup> | N/A                                                   | \$251,824<br>(\$201,459 to \$302,189)<br>(starting from 2 <sup>nd</sup> year)        | Nutrition Review Project report <sup>2</sup> |
|                         | 3. Industry compliance                               | \$1,667,070,000<br>(\$842,100,000 to \$2,972,530,000) | N/A                                                                                  | FDA's RIA <sup>3</sup>                       |
| Industry reformulation  | 4. Industry reformulation                            | N/A                                                   | \$44,550,571<br>(20,041,035 to \$82,669,271)<br>(starting from 2 <sup>nd</sup> year) |                                              |

<sup>a</sup> Policy intervention costs were inflated to 2015 US (December) dollars using the Consumer Price Index.

<sup>b</sup> Given no range of uncertainty was provided in source materials, we assumed 20% uncertainty around these costs.

Added sugar labeling is one of many provisions in FDA's rule to update the Nutrition Facts label. The cost of implementing all provisions is fixed for government (administration and monitoring and evaluation) and industry compliance. Therefore, we attributed 50% of the costs for implementing the entire labeling policy to the costs of added sugar labeling for government administration (#1), government monitoring and evaluation (#2), and industry compliance cost (#3) as this approach generated more conservative estimates. Uncertainty for the costs associated with government administration (#1) and government monitoring and evaluation (#2) was not provided in the source materials.<sup>13,14</sup> We assumed that uncertainty is 20% around these costs.

For annual costs, namely the government monitoring and evaluation cost (#2) and the industry reformulation cost (#4), we applied 3% discounting rate recommended by the Second Panel on cost-effectiveness in health and medicine<sup>15</sup> to reflect the present value of future costs of government monitoring and evaluation and industry reformulation. The model is a closed cohort model, so we computed the discounted present value of per-person costs and total national costs for persons alive at implementation who remained alive in each subsequent year (not for the larger total US population in each year, which also has growth from immigration and new persons reaching the threshold age). The year-specific discounting factor is estimated by  $1/(1+3\%)^{(t-1)}$  (t is number of years of policy intervention, t=1, 2, 3, ..., lifetime) (eTable 3):



**eTable 3. Discounting factor in each year over a lifetime**

| <b>Year</b> | <b>Discounting factor</b> |
|-------------|---------------------------|
| 1           | 1.000                     |
| 2           | 0.971                     |
| 3           | 0.943                     |
| 4           | 0.915                     |
| 5           | 0.888                     |
| ⋮           | ⋮                         |
| 67          | 0.142                     |
| 68          | 0.138                     |
| 69          | 0.134                     |
| 70          | 0.130                     |

As our model estimated the costs and health outcomes based on a closed cohort and the population size decline over time, we need to express the annual costs in proportion to the population at risk. The population at risk was estimated based on the proportion of death ( $P_{dt}$ ,  $t=1, 2, 3, \dots$ ) in each year. We first obtained the proportion of people who are alive at each year by calculating  $1-P_{dt}$  ( $t=1, 2, 3, \dots$ ). Then we multiplied the baseline population size of 235 million by the proportion of people who are alive in each year (e**Table 4**).

**eTable 4. Population size of people who are alive in each year over a lifetime (in millions)**

| Year | Population Size (Million) |
|------|---------------------------|
| 1    | 235.2                     |
| 2    | 233.7                     |
| 3    | 232.1                     |
| 4    | 230.4                     |
| 5    | 228.2                     |
| ⋮    | ⋮                         |
| 67   | 5.832                     |
| 68   | 4.348                     |
| 69   | 3.157                     |
| 70   | 2.233                     |

We then estimated the per-person annual cost for cost categories #2 and #4, by dividing the annual cost estimated in the second year of implementing the policy among all US population by the population size in the second year. Specifically, for government monitoring and evaluation, the per person annual cost is estimated  $\$251,824/233,719,989=\$0.00108$ , and that for industry reformulation is  $\$44,550,571/233,719,989=\$0.190615$ . Taken together, to estimate the discounted annual cost of #2 and #4, we multiplied the population at risk, the per person annual cost estimated at year-2, and the year-specific discounting factor, using: discounted annual cost = population at risk x per-person annual cost x  $1/(1+3\%)^{(t-1)}$ .

## **eAppendix 6. Annual health-related costs among cancer patients and the general population without cancer**

The annual health-related costs data include: 1) medical expenditure, 2) productivity loss from missed work days or disability, and 3) patient time cost associated with receiving care for cancer survivors by age (under 65 vs. above 65 years old) and phase of care (initial, continuing, end-year of life); 4) medical expenditure, 5) productivity loss, and 6) patient time cost for individuals without cancer by age and status of end year of life. The description of data source and data structure were provided in **eTable 5**.

**eTable 5. Description of Data Source of Health-Related Expenditures**

|                            | <b>A. Cancer Survivors</b>                                                                                                        |                                                                                                             | <b>B. Individuals without Cancer</b>                                                 |                                                                                                         |
|----------------------------|-----------------------------------------------------------------------------------------------------------------------------------|-------------------------------------------------------------------------------------------------------------|--------------------------------------------------------------------------------------|---------------------------------------------------------------------------------------------------------|
|                            | Data source<br>(Excess or Total)                                                                                                  | Category                                                                                                    | Data source                                                                          | Category                                                                                                |
| <b>Medical expenditure</b> | Mariotto et al. 2011, SEER-Medicare, in 2010 US dollars (Excess)                                                                  | -by phase of care <sup>a</sup><br>-by age (under 65 vs. above 65 years old)<br>-by sex                      | Kim et al. 2018, MEPS 2013-2014, <i>in vivo</i> analysis, in 2014 US dollars (Total) | -Medical expenditure among all US adults<br>-by 32 subgroups stratified by age, sex, and race/ethnicity |
|                            |                                                                                                                                   |                                                                                                             | Hogen et al. 2001, SEER-Medicare (65+), in 2001 US dollars (Total)                   | -Medical expenditure in the end year of life among all US adults                                        |
| <b>Productivity loss</b>   | Zheng et al. 2016, MEPS 2008-2012, data available for colorectal, female breast, and prostate cancers, in 2012 US dollars (Total) | -by age                                                                                                     |                                                                                      |                                                                                                         |
|                            | Guy et al. 2013, MEPS 2008-2010, all types of cancer, in 2010 US dollars (Total)                                                  | -by age<br>-by time interval since cancer diagnosis (less than 1 year vs. greater than 1 year) <sup>b</sup> | Guy et al. 2013, MEPS 2008-2010, in 2010 US dollars (Total)                          | -by age                                                                                                 |
| <b>Patient time cost</b>   | Yabroff et al. 2014, MEPS 2008-2011, all types of cancer, in 2011 US dollars (Total)                                              | -by age                                                                                                     | Yabroff et al. 2014, MEPS 2008-2011, in 2011 US dollars (Total)                      | -by age                                                                                                 |

<sup>a</sup> The definition of phases of care: 1) initial phase, defined as the first 12 months following diagnosis, 2) end-year of life phase, defined as the final 12 months of life, and 3) the continuing phase, defined as all the months between the initial phase and the end-year of life. The costs of end-year of life varied by cause of death, either cancer-specific death or death due to other causes.

<sup>b</sup> Weighted means were calculated based on sample sizes and strata means.

We extracted the raw data for each of the costing component from the published literatures.<sup>2,16-20</sup> The overall assumptions for data extraction include: 1) health-related costs for breast cancer among post-menopausal females, advanced prostate cancer, esophageal adenocarcinoma, and stomach cardia cancer, by age, sex, and phase of cancer care, were the same as those for breast cancer, prostate cancer, esophagus cancer, and stomach cancer; 2) if no data available for a specific cancer type, we assumed the costs for that cancer type were the same as the estimates of costs for all-cancer sites, e.g., medical expenditure for all-cancer sites were used to replace the medical expenditures for multiple myeloma, gallbladder, liver, and thyroid cancers; 3) we extracted the costs for end-year of life due to cancer death and assumed that death due to other causes is not a competing outcome; 4) we assumed that the end-year life medical expenditure for individuals without cancer does not vary by the 32 subgroups.

If a specific costing component was not reported directly in the raw data, we calculated the cost for that component based on available data. For example, the annual productivity loss for colorectal cancer were reported as a percentage of total health-related costs.<sup>20</sup> We multiplied the percentage and the total health-related costs to obtain the productivity loss for colorectal cancer. We also performed data imputation for unavailable data. For instance, the annual productivity loss for all-cancer sites was reported by time interval since cancer diagnosis (diagnosed within one year vs. diagnosed greater than one year).<sup>16</sup> To obtain this costing component by the defined phases of care, we calculated the weighted means which was used as

the annual productivity loss for continuing phase. We then assumed that the productivity loss in the initial phase and end-of-life phase of cancer care are 1.3 times and 4 times to the mean estimates based on available data for other cancers.<sup>2,16</sup> For individuals without cancer, we assumed that the end-of-life productivity loss is 4 times to the mean estimate of the productivity loss. The same rules applied to data imputation for patient time costs.

We then applied the age shifting to keep the expenditures consistent within each age group. Starting from 2021, individuals in the cohort of 55-64 years old will turn into the cohort of 65 years and older. Therefore, we assumed that starting from 2021, the health-related expenditures for individuals who were in the cohort of 55-64 years old would be the same as those for individuals who were in the cohort of 65 years and older at the beginning of the DiCOM model. Based on the same assumption, starting from 2031 and 2047, the health-related expenditures for the cohort of 45-54 years old and those for the cohort of 20-44 years old were projected to be the same as those for the cohort of 65 years and older, respectively. We followed the same rule and applied the age shifting for the health-related expenditures for individuals without cancer. All estimations and projections were performed in SAS 9.4. All health-related expenditures were inflated to 2015 US dollars using the Personal Health Care (PHC) index.

**eTable 6. Defining population and 32 subgroups**

| <b>Subgroups</b> | <b>Age</b> | <b>Sex</b> | <b>Race/Ethnicity</b> |
|------------------|------------|------------|-----------------------|
| 1                | 20-44y     | Female     | NHW                   |
| 2                | 20-44y     | Female     | NHB                   |
| 3                | 20-44y     | Female     | HISP                  |
| 4                | 20-44y     | Female     | OTH                   |
| 5                | 20-44y     | Male       | NHW                   |
| 6                | 20-44y     | Male       | NHB                   |
| 7                | 20-44y     | Male       | HISP                  |
| 8                | 20-44y     | Male       | OTH                   |
| 9                | 45-54y     | Female     | NHW                   |
| 10               | 45-54y     | Female     | NHB                   |
| 11               | 45-54y     | Female     | HISP                  |
| 12               | 45-54y     | Female     | OTH                   |
| 13               | 45-54y     | Male       | NHW                   |
| 14               | 45-54y     | Male       | NHB                   |
| 15               | 45-54y     | Male       | HISP                  |
| 16               | 45-54y     | Male       | OTH                   |
| 17               | 55-64y     | Female     | NHW                   |
| 18               | 55-64y     | Female     | NHB                   |
| 19               | 55-64y     | Female     | HISP                  |
| 20               | 55-64y     | Female     | OTH                   |
| 21               | 55-64y     | Male       | NHW                   |
| 22               | 55-64y     | Male       | NHB                   |
| 23               | 55-64y     | Male       | HISP                  |
| 24               | 55-64y     | Male       | OTH                   |
| 25               | 65+y       | Female     | NHW                   |
| 26               | 65+y       | Female     | NHB                   |
| 27               | 65+y       | Female     | HISP                  |
| 28               | 65+y       | Female     | OTH                   |
| 29               | 65+y       | Male       | NHW                   |
| 30               | 65+y       | Male       | NHB                   |
| 31               | 65+y       | Male       | HISP                  |
| 32               | 65+y       | Male       | OTH                   |

**eTable 7. Characteristics of US adults aged 20 years or older participated in the NHANES, 2013-2016**

| Characteristics<br>(N=10058)                   |             | Added Sugar Consumption, g/day |
|------------------------------------------------|-------------|--------------------------------|
| <b>Age, years</b>                              | 47.8 ± 0.41 |                                |
| <b>Age groups, years, N (%)</b>                |             |                                |
| 20-44                                          | 4317 (44.5) | 49.4 ± 0.50                    |
| 25-54                                          | 1704 (18.4) | 53.6 ± 1.05                    |
| 55-64                                          | 1723 (17.3) | 54.7 ± 0.74                    |
| ≥65                                            | 2314 (19.9) | 56.9 ± 0.69                    |
| <b>Sex, N (%)</b>                              |             |                                |
| Male                                           | 4826 (48.3) | 47.1 ± 0.43                    |
| Female                                         | 5232 (51.7) | 57.7 ± 0.52                    |
| <b>Race/ethnicity, N (%)</b>                   |             |                                |
| Non-Hispanic White                             | 3940 (65.0) | 53.3 ± 0.51                    |
| Non-Hispanic Black                             | 2067 (11.2) | 55.1 ± 0.90                    |
| Hispanic                                       | 2668 (14.9) | 51.5 ± 0.64                    |
| Other                                          | 1383 (8.91) | 46.2 ± 1.08                    |
| <b>Education, N (%)</b>                        |             |                                |
| Less than high school graduate                 | 2177 (14.3) | 56.6 ± 0.69                    |
| High school graduate                           | 2248 (21.6) | 55.9 ± 0.66                    |
| Some college                                   | 3067 (33.1) | 54.2 ± 0.69                    |
| College graduate                               | 2561 (31.0) | 46.8 ± 0.57                    |
| <b>Family income to poverty ratio, N (%)</b>   |             |                                |
| <1.30                                          | 3860 (28.3) | 56.6 ± 0.79                    |
| 1.30-1.84                                      | 2840 (26.7) | 54.4 ± 0.63                    |
| 1.85-2.99                                      | 1723 (20.4) | 50.9 ± 0.84                    |
| ≥3.00                                          | 1635 (24.5) | 47.5 ± 0.77                    |
| <b>Body mass index (BMI), kg/m<sup>2</sup></b> | 29.3 ± 0.16 |                                |
| <b>Weight status, N (%)</b>                    |             |                                |
| Underweight (BMI<18.5)                         | 145 (1.36)  | 56.2 ± 2.18                    |
| Normal weight (BMI=18.5-24.9)                  | 2670 (27.2) | 52.3 ± 0.65                    |
| Overweight/Obese (BMI≥25)                      | 7158 (71.4) | 52.7 ± 0.42                    |

**eTable 8. Consumption of added sugar from foods and beverages among US adults participated in 2013-2016 NHANES, by 32 subgroups**

| Age group, years | Sex    | Race/ethnicity | Baseline consumption, g/day (mean ± SE) |
|------------------|--------|----------------|-----------------------------------------|
| 20-44            | Female | NHW            | 53.8 ± 0.93                             |
|                  |        | NHB            | 57.8 ± 2.02                             |
|                  |        | Hispanic       | 55.3 ± 0.94                             |
|                  |        | Other          | 49.0 ± 1.14                             |
|                  | Male   | NHW            | 45.0 ± 0.97                             |
|                  |        | NHB            | 45.9 ± 1.41                             |
|                  |        | Hispanic       | 45.9 ± 0.88                             |
|                  |        | Other          | 39.9 ± 2.14                             |
| 45-54            | Female | NHW            | 60.9 ± 1.85                             |
|                  |        | NHB            | 61.0 ± 1.88                             |
|                  |        | Hispanic       | 54.4 ± 1.87                             |
|                  |        | Other          | 51.5 ± 3.81                             |
|                  | Male   | NHW            | 48.5 ± 1.18                             |
|                  |        | NHB            | 46.9 ± 1.78                             |
|                  |        | Hispanic       | 48.4 ± 1.22                             |
|                  |        | Other          | 38.8 ± 2.05                             |
| 55-64            | Female | NHW            | 61.4 ± 1.57                             |
|                  |        | NHB            | 63.7 ± 1.96                             |
|                  |        | Hispanic       | 55.2 ± 1.08                             |
|                  |        | Other          | 52.0 ± 3.18                             |
|                  | Male   | NHW            | 49.2 ± 1.49                             |
|                  |        | NHB            | 52.6 ± 1.01                             |
|                  |        | Hispanic       | 49.3 ± 1.80                             |
|                  |        | Other          | 39.5 ± 2.34                             |
| ≥65              | Female | NHW            | 61.5 ± 1.15                             |
|                  |        | NHB            | 66.5 ± 1.45                             |
|                  |        | Hispanic       | 60.6 ± 1.34                             |
|                  |        | Other          | 57.4 ± 2.47                             |
|                  | Male   | NHW            | 50.9 ± 1.12                             |
|                  |        | NHB            | 56.0 ± 1.69                             |
|                  |        | Hispanic       | 50.0 ± 1.24                             |
|                  |        | Other          | 49.4 ± 2.87                             |



**eTable 9 Relative risk estimates of etiologic relationships between body mass index (BMI) and cancer**

| <b>Cancer Type</b>          | <b>No. of Studies</b> | <b>No. of Events</b> | <b>Source</b>            | <b>Evidence Grading</b>    | <b>RR (95% CI)<br/>Per 5 kg/m<sup>2</sup></b> | <b>Statistical Heterogeneity</b>  |
|-----------------------------|-----------------------|----------------------|--------------------------|----------------------------|-----------------------------------------------|-----------------------------------|
| Corpus uteri                | 26                    | 18,717               | CUP, 2013                | Convincing<br>↑risk        | 1.50 (1.42-1.59)                              | I <sup>2</sup> =86.2%<br>P<0.0001 |
| Esophageal (adenocarcinoma) | 9                     | 1,725                | CUP, 2016                | Convincing<br>↑risk        | 1.48 (1.35-1.62)                              | I <sup>2</sup> =36.7%<br>P=0.13   |
| Kidney                      | 23                    | 15,575               | CUP, 2015                | Convincing<br>↑risk        | 1.30 (1.25-1.35)                              | I <sup>2</sup> =38.8%<br>P=0.03   |
| Liver                       | 12                    | 14,311               | CUP, 2015                | Convincing<br>↑risk        | 1.30 (1.16-1.46)                              | I <sup>2</sup> =78.3%<br>P=0.000  |
| Gallbladder                 | 8                     | 6,004                | CUP, 2015                | Probable<br>↑risk          | 1.25 (1.15-1.37)                              | I <sup>2</sup> =52.3%<br>P=0.04   |
| Stomach (cardia)            | 7                     | 2,050                | CUP, 2016                | Probable<br>↑risk          | 1.23 (1.07-1.40)                              | I <sup>2</sup> =55.6%<br>P=0.04   |
| Breast (post-menopausal)    | 56                    | 80,404               | CUP, 2017                | Convincing<br>↑risk        | 1.12 (1.09-1.15)                              | I <sup>2</sup> =75%<br>P<0.001    |
| Pancreas                    | 23                    | 9,504                | CUP, 2011                | Convincing<br>↑risk        | 1.10 (1.07-1.14)                              | I <sup>2</sup> =19%<br>P=0.20     |
| Multiple myeloma            | 20                    | 1,388                | IARC, 2016 <sup>22</sup> | Sufficient (IRAC)<br>↑risk | 1.09 (1.03-1.16)                              | Not reported                      |
| Prostate (advanced)         | 24                    | 11,149               | CUP, 2014                | Probable<br>↑risk          | 1.08 (1.04-1.12)                              | I <sup>2</sup> =18.8%<br>P=0.21   |
| Thyroid                     | 22                    | 3,100                | IARC, 2016 <sup>22</sup> | Sufficient (IARC)<br>↑risk | 1.06 (1.02-1.10)                              | Not reported                      |
| Ovary                       | 25                    | 15,899               | CUP, 2013                | Probable<br>↑risk          | 1.06 (1.02-1.11)                              | I <sup>2</sup> =55.1%<br>P=0.001  |
| Colorectal                  | 38                    | 71,089               | CUP, 2017                | Convincing<br>↑risk        | 1.05 (1.03-1.07)                              | I <sup>2</sup> =74.2%<br>P=0.000  |

**eTable 10. Health-related quality of life among US cancer patients aged 20 years or older, by cancer type and phase of care**

| Cancer Type                     | Cancer Phase | Health Related Quality of Life | Source                               |
|---------------------------------|--------------|--------------------------------|--------------------------------------|
|                                 |              | mean (SE)                      |                                      |
| Endometrial                     | Overall      | 0.80 (0.14)                    | Naik et al. <sup>23</sup>            |
| Esophageal Adenocarcinoma       | Overall      | 0.69 (0.26)                    | Wildi et al. <sup>24</sup>           |
| Kidney                          | Overall      | 0.78 (0.14)                    | Pickard et al. <sup>25</sup>         |
| Liver                           | Overall      | 0.79 (0.19)                    | Naik et al. <sup>23</sup>            |
| Gallbladder                     | Overall      | 0.79 (0.19)                    | Naik et al. <sup>23</sup>            |
| Stomach (gastric cardia)        | Initial:     | 0.84 (0.25)                    | Zhou et al. <sup>26</sup>            |
|                                 | Continuous:  | 0.86 (0.24)                    |                                      |
|                                 | End of Life: | 0.65 (0.33)                    |                                      |
| Female Breast (post-menopausal) | Initial:     | 0.78 (0.19)                    | Yabroff et al. <sup>27</sup>         |
|                                 | Continuous:  | 0.81 (0.20)                    |                                      |
|                                 | End of Life: | 0.64 (0.16)                    |                                      |
| Pancreas                        | Overall      | 0.65 (0.30)                    | Müller-Nordhorn et al. <sup>28</sup> |
| Multiple myeloma                | Overall      | 0.79 (0.19)                    | Naik et al. <sup>23</sup>            |
| Advanced Prostate               | Initial:     | 0.78 (0.20)                    | Yabroff et al. <sup>27</sup>         |
|                                 | Continuous:  | 0.76 (0.19)                    |                                      |
|                                 | End of Life: | 0.59 (0.15)                    |                                      |
| Thyroid                         | Overall      | 0.85 (0.13)                    | Naik et al. <sup>23</sup>            |
| Ovary                           | Overall      | 0.77 (0.17)                    | Pickard et al. <sup>25</sup>         |
| Colorectal                      | Initial:     | 0.76 (0.19)                    | Färkkilä et al. <sup>29</sup>        |
|                                 | Continuous:  | 0.84 (0.20)                    |                                      |
|                                 | End of Life: | 0.64 (0.26)                    |                                      |

**eTable 11. Baseline medical costs, productivity loss, and patient time costs among US cancer patients aged 20 years or older, by cancer type**

| Cancer type               | Sex    | Age | Medical costs |            |             | Productivity loss |            |             | Patient time cost |            |             |
|---------------------------|--------|-----|---------------|------------|-------------|-------------------|------------|-------------|-------------------|------------|-------------|
|                           |        |     | Initial       | Continuous | End-of-life | Initial           | Continuous | End-of-life | Initial           | Continuous | End-of-life |
| Esophageal Adenocarcinoma | Female | <65 | 95439         | 6853       | 156417      | 4884              | 3757       | 15027       | 650               | 500        | 2001        |
|                           |        | ≥65 | 79532         | 6853       | 104278      | 6984              | 5372       | 21489       | 1187              | 913        | 3652        |
|                           | Male   | <65 | 95787         | 6450       | 155612      | 4884              | 3757       | 15027       | 650               | 500        | 2001        |
|                           |        | ≥65 | 79822         | 6450       | 103742      | 6984              | 5372       | 21489       | 1187              | 913        | 3652        |
| Stomach (Gastric Cardia)  | Female | <65 | 85291         | 3977       | 155636      | 4884              | 3757       | 15027       | 650               | 500        | 2001        |
|                           |        | ≥65 | 71076         | 3977       | 103758      | 6984              | 5372       | 21489       | 1187              | 913        | 3652        |
|                           | Male   | <65 | 94144         | 4282       | 160695      | 4884              | 3757       | 15027       | 650               | 500        | 2001        |
|                           |        | ≥65 | 78453         | 4282       | 107130      | 6984              | 5372       | 21489       | 1187              | 913        | 3652        |
| Liver                     | Female | <65 | 40173         | 5859       | 95782       | 4884              | 3757       | 15027       | 650               | 500        | 2001        |
|                           |        | ≥65 | 40173         | 5859       | 95782       | 6984              | 5372       | 21489       | 1187              | 913        | 3652        |
|                           | Male   | <65 | 41161         | 7363       | 97473       | 4884              | 3757       | 15027       | 650               | 500        | 2001        |
|                           |        | ≥65 | 41161         | 7363       | 97473       | 6984              | 5372       | 21489       | 1187              | 913        | 3652        |
| Pancreatic                | Female | <65 | 112154        | 8672       | 164911      | 4884              | 3757       | 15027       | 650               | 500        | 2001        |
|                           |        | ≥65 | 93462         | 8672       | 109941      | 6984              | 5372       | 21489       | 1187              | 913        | 3652        |
|                           | Male   | <65 | 112911        | 11697      | 169673      | 4884              | 3757       | 15027       | 650               | 500        | 2001        |
|                           |        | ≥65 | 94092         | 11697      | 113115      | 6984              | 5372       | 21489       | 1187              | 913        | 3652        |
| Advanced Prostate         | Male   | <65 | 23652         | 3201       | 93363       | 3715              | 2858       | 11432       | 650               | 500        | 2001        |
|                           |        | ≥65 | 19710         | 3201       | 62242       | 6549              | 5038       | 20152       | 1187              | 913        | 3652        |
| Colorectal                | Female | <65 | 61593         | 3159       | 126778      | 10330             | 7946       | 31784       | 650               | 500        | 2001        |

|                         |        |     |       |      |        |       |      |       |      |     |      |
|-------------------------|--------|-----|-------|------|--------|-------|------|-------|------|-----|------|
|                         |        | ≥65 | 51327 | 3159 | 84519  | 7479  | 5753 | 23012 | 1187 | 913 | 3652 |
|                         | Male   | <65 | 62174 | 4595 | 128507 | 10330 | 7946 | 31784 | 650  | 500 | 2001 |
|                         |        | ≥65 | 51812 | 4595 | 85671  | 7479  | 5753 | 23012 | 1187 | 913 | 3652 |
|                         |        |     |       |      |        |       |      |       |      |     |      |
| Endometrial             | Female | <65 | 32129 | 1535 | 105262 | 4884  | 3757 | 15027 | 650  | 500 | 2001 |
|                         |        | ≥65 | 26775 | 1535 | 70175  | 6984  | 5372 | 21489 | 1187 | 913 | 3652 |
|                         |        |     |       |      |        |       |      |       |      |     |      |
| Ovarian                 | Female | <65 | 98788 | 8296 | 149573 | 4884  | 3757 | 15027 | 650  | 500 | 2001 |
|                         |        | ≥65 | 82324 | 8296 | 99715  | 6984  | 5372 | 21489 | 1187 | 913 | 3652 |
|                         |        |     |       |      |        |       |      |       |      |     |      |
| Gallbladder             | Female | <65 | 40173 | 5859 | 95782  | 4884  | 3757 | 15027 | 650  | 500 | 2001 |
|                         |        | ≥65 | 40173 | 5859 | 95782  | 6984  | 5372 | 21489 | 1187 | 913 | 3652 |
|                         | Male   | <65 | 41161 | 7363 | 97473  | 4884  | 3757 | 15027 | 650  | 500 | 2001 |
|                         |        | ≥65 | 41161 | 7363 | 97473  | 6984  | 5372 | 21489 | 1187 | 913 | 3652 |
|                         |        |     |       |      |        |       |      |       |      |     |      |
| Kidney (Renal Cell)     | Female | <65 | 46077 | 6255 | 110765 | 4884  | 3757 | 15027 | 650  | 500 | 2001 |
|                         |        | ≥65 | 38397 | 6255 | 73843  | 6984  | 5372 | 21489 | 1187 | 913 | 3652 |
|                         | Male   | <65 | 46048 | 6018 | 117123 | 4884  | 3757 | 15027 | 650  | 500 | 2001 |
|                         |        | ≥65 | 38374 | 6018 | 78082  | 6984  | 5372 | 21489 | 1187 | 913 | 3652 |
|                         |        |     |       |      |        |       |      |       |      |     |      |
| Breast (Postmenopausal) | Female | <65 | 27693 | 2207 | 94284  | 5985  | 4604 | 18416 | 650  | 500 | 2001 |
|                         |        | ≥65 | 23078 | 2207 | 62856  | 4752  | 3655 | 14620 | 1187 | 913 | 3652 |
|                         |        |     |       |      |        |       |      |       |      |     |      |
| Thyroid                 | Female | <65 | 40173 | 5859 | 95782  | 4884  | 3757 | 15027 | 650  | 500 | 2001 |
|                         |        | ≥65 | 40173 | 5859 | 95782  | 6984  | 5372 | 21489 | 1187 | 913 | 3652 |
|                         | Male   | <65 | 41161 | 7363 | 97473  | 4884  | 3757 | 15027 | 650  | 500 | 2001 |
|                         |        | ≥65 | 41161 | 7363 | 97473  | 6984  | 5372 | 21489 | 1187 | 913 | 3652 |
|                         |        |     |       |      |        |       |      |       |      |     |      |

|                  |        |     |       |      |       |      |      |       |      |     |      |
|------------------|--------|-----|-------|------|-------|------|------|-------|------|-----|------|
| Multiple Myeloma | Female | <65 | 40173 | 5859 | 95782 | 4884 | 3757 | 15027 | 650  | 500 | 2001 |
|                  |        | ≥65 | 40173 | 5859 | 95782 | 6984 | 5372 | 21489 | 1187 | 913 | 3652 |
|                  | Male   | <65 | 41161 | 7363 | 97473 | 4884 | 3757 | 15027 | 650  | 500 | 2001 |
|                  |        | ≥65 | 41161 | 7363 | 97473 | 6984 | 5372 | 21489 | 1187 | 913 | 3652 |

**eTable 12. Baseline medical costs, productivity loss, and patient time costs among general population aged 20 years or older in the US, by 32 subgroups**

| Age group, years | Sex    | Race/ethnicity | Medical costs        |                   | Productivity loss    |                   | Patient time cost    |                   |
|------------------|--------|----------------|----------------------|-------------------|----------------------|-------------------|----------------------|-------------------|
|                  |        |                | Annual general costs | End-of-life costs | Annual general costs | End-of-life costs | Annual general costs | End-of-life costs |
| 20-44            | Female | NHW            | 4020                 | 40000             | 2040                 | 8160              | 226                  | 904               |
|                  |        | NHB            | 3100                 | 40000             | 2040                 | 8160              | 226                  | 904               |
|                  |        | Hispanic       | 2355                 | 40000             | 2040                 | 8160              | 226                  | 904               |
|                  |        | Other          | 2617                 | 40000             | 2040                 | 8160              | 226                  | 904               |
|                  | Male   | NHW            | 2022                 | 40000             | 2040                 | 8160              | 226                  | 904               |
|                  |        | NHB            | 2279                 | 40000             | 2040                 | 8160              | 226                  | 904               |
|                  |        | Hispanic       | 1145                 | 40000             | 2040                 | 8160              | 226                  | 904               |
|                  |        | Other          | 1803                 | 40000             | 2040                 | 8160              | 226                  | 904               |
| 45-54            | Female | NHW            | 5371                 | 40000             | 2040                 | 8160              | 226                  | 904               |
|                  |        | NHB            | 5712                 | 40000             | 2040                 | 8160              | 226                  | 904               |
|                  |        | Hispanic       | 3196                 | 40000             | 2040                 | 8160              | 226                  | 904               |
|                  |        | Other          | 4082                 | 40000             | 2040                 | 8160              | 226                  | 904               |
|                  | Male   | NHW            | 3812                 | 40000             | 2040                 | 8160              | 226                  | 904               |
|                  |        | NHB            | 3639                 | 40000             | 2040                 | 8160              | 226                  | 904               |
|                  |        | Hispanic       | 3612                 | 40000             | 2040                 | 8160              | 226                  | 904               |
|                  |        | Other          | 2560                 | 40000             | 2040                 | 8160              | 226                  | 904               |
| 55-64            | Female | NHW            | 7300                 | 40000             | 2040                 | 8160              | 226                  | 904               |
|                  |        | NHB            | 5479                 | 40000             | 2040                 | 8160              | 226                  | 904               |
|                  |        | Hispanic       | 4607                 | 40000             | 2040                 | 8160              | 226                  | 904               |
|                  |        | Other          | 3951                 | 40000             | 2040                 | 8160              | 226                  | 904               |
|                  | Male   | NHW            | 6519                 | 40000             | 2040                 | 8160              | 226                  | 904               |
|                  |        | NHB            | 6455                 | 40000             | 2040                 | 8160              | 226                  | 904               |
|                  |        | Hispanic       | 5077                 | 40000             | 2040                 | 8160              | 226                  | 904               |
|                  |        | Other          | 6320                 | 40000             | 2040                 | 8160              | 226                  | 904               |
| ≥65              | Female | NHW            | 8997                 | 40000             | 4409                 | 8160              | 607                  | 904               |
|                  |        | NHB            | 9585                 | 40000             | 4409                 | 8160              | 607                  | 904               |
|                  |        | Hispanic       | 8847                 | 40000             | 4409                 | 8160              | 607                  | 904               |
|                  |        | Other          | 8625                 | 40000             | 4409                 | 8160              | 607                  | 904               |

|  |      |          |      |       |      |      |     |     |
|--|------|----------|------|-------|------|------|-----|-----|
|  | Male | NHW      | 9334 | 40000 | 4409 | 8160 | 607 | 904 |
|  |      | NHB      | 7367 | 40000 | 4409 | 8160 | 607 | 904 |
|  |      | Hispanic | 5640 | 40000 | 4409 | 8160 | 607 | 904 |
|  |      | Other    | 7461 | 40000 | 4409 | 8160 | 607 | 904 |

**eTable 13. Estimated changes in health-related costs associated with Nutrition Facts added sugar labeling on reducing cancer burdens in the US over a lifetime, by cancer type<sup>a</sup>**

| Changes in Health-Related Costs <sup>b</sup><br>(\$, millions) | Added Sugar Labeling Policy                 |                                                                    |
|----------------------------------------------------------------|---------------------------------------------|--------------------------------------------------------------------|
|                                                                | Consumer Behavior<br>Median (2.5% to 97.5%) | Consumer Behavior +<br>Industry Response<br>Median (2.5% to 97.5%) |
| <i>Medical Cost</i>                                            |                                             |                                                                    |
| Kidney Cancer (Renal Cell)                                     | -347 (-439 to -263)                         | -698 (-850 to -561)                                                |
| Liver Cancer                                                   | -346 (-450 to -266)                         | -684 (-863 to -549)                                                |
| Breast Cancer (Postmenopausal)                                 | -226 (-351 to -128)                         | -544 (-747 to -392)                                                |
| Endometrial Cancer                                             | -218 (-334 to -126)                         | -536 (-708 to -390)                                                |
| Pancreatic Cancer                                              | -173 (-226 to -126)                         | -368 (-455 to -289)                                                |
| Esophageal Adenocarcinoma                                      | -155 (-213 to -112)                         | -300 (-384 to -224)                                                |
| Colorectal Cancer                                              | -96.0 (-122 to -72.1)                       | -192 (-236 to -152)                                                |
| Stomach Cancer (Gastric Cardia)                                | -64.3 (-95.3 to -44.5)                      | -127 (-174 to -91.1)                                               |
| Thyroid Cancer                                                 | -50.1 (-76.2 to -32.9)                      | -110 (-155 to -79.9)                                               |
| Multiple Myeloma                                               | -46.2 (-65 to -32.6)                        | -98.3 (-129 to -73.4)                                              |
| Gallbladder Cancer                                             | -21.2 (-27.0 to -16.0)                      | -45.3 (-55.2 to -37.0)                                             |
| Ovarian Cancer                                                 | -20.6 (-35.8 to -9.33)                      | -50.9 (-76.9 to -29.0)                                             |
| Advanced Prostate Cancer                                       | -14.8 (-20.6 to -10.3)                      | -28.0 (-37.6 to -20.2)                                             |
| <i>Productivity Loss</i>                                       |                                             |                                                                    |
| Endometrial Cancer                                             | -196 (-301 to -109)                         | -484 (-641 to -344)                                                |
| Kidney Cancer (Renal Cell)                                     | -156 (-199 to -119)                         | -314 (-383 to -252)                                                |
| Breast Cancer (Postmenopausal)                                 | -99.8 (-163 to -52.2)                       | -246 (-340 to -172)                                                |
| Liver Cancer                                                   | -83.5 (-109 to -64.4)                       | -166 (-207 to -134)                                                |
| Colorectal Cancer                                              | -43.6 (-55.5 to -32.4)                      | -88.1 (-109 to -69.5)                                              |
| Thyroid Cancer                                                 | -27.4 (-42.9 to -17.4)                      | -61.2 (-87.9 to -43.8)                                             |
| Esophageal Adenocarcinoma                                      | -26.5 (-37.0 to -19.0)                      | -51.8 (-67.3 to -39.3)                                             |
| Pancreatic Cancer                                              | -25.7 (-34.0 to -18.6)                      | -54.8 (-67.3 to -43.1)                                             |
| Multiple Myeloma                                               | -16.1 (-23.0 to -11.2)                      | -34.5 (-45.6 to -25.7)                                             |
| Stomach Cancer (Gastric Cardia)                                | -12.1 (-17.7 to -8.38)                      | -24.2 (-33.0 to -17.4)                                             |
| Advanced Prostate Cancer                                       | -9.31 (-13.1 to -6.37)                      | -17.7 (-24.3 to -12.5)                                             |
| Gallbladder Cancer                                             | -5.46 (-7.02 to -4.14)                      | -11.7 (-14.2 to -9.58)                                             |
| Ovarian Cancer                                                 | -4.68 (-8.27 to -2.12)                      | -11.6 (-17.9 to -6.38)                                             |
| <i>Patient Time Cost</i>                                       |                                             |                                                                    |
| Endometrial Cancer                                             | -31.4 (-48.6 to -17.3)                      | -77.4 (-102 to -55.3)                                              |
| Kidney Cancer (Renal Cell)                                     | -24.7 (-31.5 to -18.8)                      | -49.9 (-60.4 to -40.1)                                             |
| Breast Cancer (Postmenopausal)                                 | -22.7 (-36.3 to -12.3)                      | -54.8 (-76.6 to -37.3)                                             |
| Liver Cancer                                                   | -13.1 (-16.9 to -10.1)                      | -26.1 (-32.3 to -21.0)                                             |
| Colorectal Cancer                                              | -5.23 (-6.65 to -3.89)                      | -10.6 (-13.0 to -8.37)                                             |
| Thyroid Cancer                                                 | -4.24 (-6.54 to -2.73)                      | -9.47 (-13.5 to -6.77)                                             |
| Esophageal Adenocarcinoma                                      | -4.22 (-5.96 to -3.04)                      | -8.24 (-10.7 to -6.26)                                             |
| Pancreatic Cancer                                              | -4.12 (-5.42 to -3.00)                      | -8.74 (-10.7 to -6.86)                                             |
| Multiple Myeloma                                               | -2.59 (-3.67 to -1.80)                      | -5.53 (-7.36 to -4.11)                                             |
| Stomach Cancer (Gastric Cardia)                                | -1.92 (-2.81 to -1.33)                      | -3.85 (-5.27 to -2.79)                                             |
| Advanced Prostate Cancer                                       | -1.71 (-2.41 to -1.18)                      | -3.25 (-4.45 to -2.31)                                             |
| Gallbladder Cancer                                             | -0.88 (-1.13 to -0.67)                      | -1.88 (-2.29 to -1.54)                                             |
| Ovarian Cancer                                                 | -0.74 (-1.29 to -0.34)                      | -1.81 (-2.78 to -1.00)                                             |

<sup>a</sup>Values are the median estimates (95% uncertainty intervals) of each distribution of 1000 simulations.

<sup>b</sup>Health-related costs were inflated to 2015 US dollars using the Personal Health Care (PHC) index. Negative costs represent savings. Costs are medians from 1000 simulations so may not add up to totals.



**eTable 14. Estimated new cancer cases averted by Nutrition Facts added sugar labeling policy in the US by age, gender, race/ethnicity, and cancer type over a lifetime (US population=235,162,844)<sup>a</sup>**

| Cancer Type                    | Policy Scenario           | 20-44 y                |      | 45-54 y               |      | 55-64 y               |      | 65 + y                |      |
|--------------------------------|---------------------------|------------------------|------|-----------------------|------|-----------------------|------|-----------------------|------|
|                                |                           | Female                 | Male | Female                | Male | Female                | Male | Female                | Male |
| <b>Endometrial</b>             |                           |                        |      |                       |      |                       |      |                       |      |
| Age                            | <i>consumer behavior</i>  | 3040 (1060 to 5750)    |      | 614 (-468 to 2210)    |      | 1170 (410 to 2470)    |      | 1080 (505 to 2050)    |      |
|                                | <i>+industry response</i> | 7660 (4210 to 11900)   |      | 2470 (857 to 4790)    |      | 2620 (1250 to 4580)   |      | 2230 (1140 to 3720)   |      |
| Race/Ethnicity                 |                           |                        |      |                       |      |                       |      |                       |      |
| Non-Hispanic White             | <i>consumer behavior</i>  | 1680<br>(196 to 4060)  | 0    | 507<br>(-472 to 1940) | 0    | 778<br>(79 to 2020)   | 0    | 846<br>(323 to 1810)  | 0    |
|                                | <i>+industry response</i> | 4310<br>(1520 to 7980) | 0    | 1750<br>(162 to 3850) | 0    | 1840<br>(590 to 3780) | 0    | 1710<br>(658 to 3250) | 0    |
| Non-Hispanic Black             | <i>consumer behavior</i>  | 635<br>(-82 to 1830)   | 0    | -1<br>(-248 to 443)   | 0    | 215<br>(47 to 498)    | 0    | 124<br>(36 to 297)    | 0    |
|                                | <i>+industry response</i> | 1440<br>(412 to 3020)  | 0    | 322<br>(-81 to 896)   | 0    | 421<br>(152 to 812)   | 0    | 270<br>(91 to 525)    | 0    |
| Hispanic                       | <i>consumer behavior</i>  | 408<br>(-185 to 1320)  | 0    | 4<br>(-199 to 377)    | 0    | 86<br>(6 to 230)      | 0    | 58<br>(-4 to 166)     | 0    |
|                                | <i>+industry response</i> | 1330<br>(130 to 2820)  | 0    | 252<br>(-70.2 to 795) | 0    | 215<br>(52 to 441)    | 0    | 150<br>(31 to 319)    | 0    |
| Other                          | <i>consumer behavior</i>  | 202<br>(69 to 425)     | 0    | 53<br>(-53 to 225)    | 0    | 43<br>(-7 to 123)     | 0    | 25<br>(-3 to 78)      | 0    |
|                                | <i>+industry response</i> | 418<br>(176 to 752)    | 0    | 112<br>(10 to 305)    | 0    | 81<br>(26 to 177)     | 0    | 53<br>(16 to 117)     | 0    |
| <b>Breast (Postmenopausal)</b> |                           |                        |      |                       |      |                       |      |                       |      |
| Age                            | <i>consumer behavior</i>  | 2450 (856 to 4770)     |      | 586 (-427 to 2160)    |      | 1200 (412 to 2610)    |      | 1210 (532 to 2430)    |      |
|                                | <i>+industry response</i> | 6070 (3220 to 9930)    |      | 2210 (700 to 4620)    |      | 2720 (1270 to 4700)   |      | 2510 (1220 to 4390)   |      |
| Race/Ethnicity                 |                           |                        |      |                       |      |                       |      |                       |      |
| Non-Hispanic White             | <i>consumer behavior</i>  | 1450<br>(142 to 3640)  | 0    | 378<br>(-507 to 1880) | 0    | 847<br>(87 to 2250)   | 0    | 980<br>(362 to 2210)  | 0    |
|                                | <i>+industry response</i> | 3660                   | 0    | 1520<br>(100 to 3710) | 0    | 2020<br>(640 to 3980) | 0    | 2030                  | 0    |

|                            |                           |                       |                        |                     |                      |                     |                      |                     |                      |
|----------------------------|---------------------------|-----------------------|------------------------|---------------------|----------------------|---------------------|----------------------|---------------------|----------------------|
|                            |                           | (1150 to 7420)        |                        |                     |                      |                     |                      | (782 to 3990)       |                      |
| Non-Hispanic Black         | <i>consumer behavior</i>  | 441<br>(-61 to 1330)  | 0                      | 76<br>(-119 to 447) | 0                    | 196<br>(48 to 440)  | 0                    | 114<br>(29 to 291)  | 0                    |
|                            | <i>+industry response</i> | 1020<br>(277 to 2330) | 0                      | 333<br>(10 to 863)  | 0                    | 375<br>(140 to 734) | 0                    | 249<br>(78 to 522)  | 0                    |
| Hispanic                   | <i>consumer behavior</i>  | 251<br>(-137 to 887)  | 0                      | -5<br>(-157 to 300) | 0                    | 75<br>(6 to 208)    | 0                    | 55<br>(-4 to 166)   | 0                    |
|                            | <i>+industry response</i> | 868<br>(78 to 1910)   | 0                      | 186<br>(-66 to 595) | 0                    | 187<br>(44 to 384)  | 0                    | 143<br>(32 to 305)  | 0                    |
| Other                      | <i>consumer behavior</i>  | 189<br>(61 to 409)    | 0                      | 59<br>(-58 to 263)  | 0                    | 56<br>(-7 to 166)   | 0                    | 35<br>(-4 to 109)   | 0                    |
|                            | <i>+industry response</i> | 395<br>(153 to 723)   | 0                      | 124<br>(13 to 363)  | 0                    | 105<br>(34 to 242)  | 0                    | 75<br>(22 to 167)   | 0                    |
|                            |                           |                       |                        |                     |                      |                     |                      |                     |                      |
| <b>Kidney (Renal Cell)</b> |                           |                       |                        |                     |                      |                     |                      |                     |                      |
| Age                        | <i>consumer behavior</i>  | 3180 (2210 to 4600)   |                        | 778 (304 to 1410)   |                      | 865 (483 to 1450)   |                      | 672 (379 to 1120)   |                      |
|                            | <i>+industry response</i> | 5960 (4350 to 8110)   |                        | 1890 (1130 to 2820) |                      | 1740 (1140 to 2570) |                      | 1360 (785 to 2060)  |                      |
| Race/Ethnicity             |                           |                       |                        |                     |                      |                     |                      |                     |                      |
| Non-Hispanic White         | <i>consumer behavior</i>  | 349<br>(53 to 842)    | 1750<br>(1110 to 2990) | 93<br>(-103 to 389) | 350<br>(25 to 904)   | 177<br>(18 to 476)  | 409<br>(124 to 949)  | 200<br>(74 to 430)  | 297<br>(75 to 695)   |
|                            | <i>+industry response</i> | 887<br>(308 to 1710)  | 2800<br>(1590 to 4640) | 347<br>(28 to 772)  | 826<br>(237 to 1670) | 418<br>(129 to 839) | 803<br>(296 to 1560) | 416<br>(154 to 783) | 615<br>(181 to 1230) |
| Non-Hispanic Black         | <i>consumer behavior</i>  | 144<br>(-17 to 407)   | 214<br>(9 to 563)      | 4<br>(-54 to 104)   | 104<br>(25 to 254)   | 55<br>(11 to 130)   | 69<br>(27 to 140)    | 34<br>(9 to 82)     | 41<br>(12 to 86)     |
|                            | <i>+industry response</i> | 324<br>(87 to 706)    | 467<br>(137 to 971)    | 77<br>(-15 to 213)  | 191<br>(77 to 376)   | 107<br>(39 to 212)  | 134<br>(53 to 238)   | 73<br>(24 to 145)   | 74<br>(30 to 138)    |
| Hispanic                   | <i>consumer behavior</i>  | 114<br>(-62 to 367)   | 340<br>(78 to 764)     | 0<br>(-60 to 112)   | 131<br>(45 to 270)   | 28<br>(2 to 74)     | 50<br>(-10 to 152)   | 21<br>(-1 to 57)    | 32<br>(9 to 70)      |
|                            | <i>+industry response</i> | 395<br>(27 to 812)    | 763<br>(177 to 1430)   | 76<br>(-19 to 231)  | 253<br>(96 to 451)   | 71<br>(17 to 145)   | 111<br>(25 to 242)   | 53<br>(11 to 112)   | 64<br>(22 to 118)    |
| Other                      | <i>consumer behavior</i>  | 32<br>(11 to 66)      | 83<br>(5 to 217)       | 10<br>(-9 to 42)    | 25<br>(2 to 57)      | 9<br>(-1 to 27)     | 24<br>(7 to 50)      | 6<br>(-1 to 18)     | 12<br>(0 to 30)      |
|                            | <i>+industry response</i> | 66<br>(28 to 120)     | 150<br>(61 to 315)     | 20<br>(2 to 56)     | 43<br>(17 to 82)     | 17<br>(6 to 39)     | 36<br>(18 to 67)     | 13<br>(4 to 28)     | 20<br>(7 to 42)      |
|                            |                           |                       |                        |                     |                      |                     |                      |                     |                      |
| <b>Liver</b>               |                           |                       |                        |                     |                      |                     |                      |                     |                      |
| Age                        | <i>consumer behavior</i>  | 2990 (2070 to 4450)   |                        | 841 (380 to 1500)   |                      | 717 (422 to 1190)   |                      | 476 (281 to 808)    |                      |

|                    |                           |                      |                        |                     |                      |                    |                      |                    |                     |
|--------------------|---------------------------|----------------------|------------------------|---------------------|----------------------|--------------------|----------------------|--------------------|---------------------|
|                    | <i>+industry response</i> | 5700 (4110 to 8320)  |                        | 1920 (1110 to 2990) |                      | 1390 (917 to 2100) |                      | 958 (571 to 1510)  |                     |
| Race/Ethnicity     |                           |                      |                        |                     |                      |                    |                      |                    |                     |
| Non-Hispanic White | <i>consumer behavior</i>  | 223<br>(27 to 647)   | 1600<br>(1000 to 2950) | 64<br>(-59 to 289)  | 307<br>(4 to 900)    | 100<br>(8 to 297)  | 315<br>(112 to 727)  | 106<br>(38 to 265) | 195<br>(55 to 465)  |
|                    | <i>+industry response</i> | 569<br>(158 to 1300) | 2540<br>(1330 to 4770) | 222<br>(18 to 567)  | 749<br>(160 to 1720) | 235<br>(74 to 528) | 588<br>(224 to 1210) | 222<br>(74 to 482) | 400<br>(112 to 842) |
| Non-Hispanic Black | <i>consumer behavior</i>  | 115<br>(-16 to 363)  | 297<br>(17 to 853)     | 21<br>(-26 to 117)  | 148<br>(25 to 397)   | 33<br>(6 to 89)    | 91<br>(32 to 201)    | 20<br>(5 to 53)    | 52<br>(18 to 115)   |
|                    | <i>+industry response</i> | 261<br>(57 to 629)   | 646<br>(168 to 1410)   | 81<br>(-1 to 214)   | 281<br>(105 to 644)  | 68<br>(23 to 150)  | 179<br>(61 to 355)   | 43<br>(13 to 98)   | 96<br>(39 to 189)   |
| Hispanic           | <i>consumer behavior</i>  | 88<br>(-77 to 364)   | 403<br>(97 to 966)     | 2<br>(-56 to 137)   | 181<br>(76 to 372)   | 29<br>(0 to 95)    | 56<br>(-13 to 181)   | 21<br>(-2 to 67)   | 29<br>(5 to 77)     |
|                    | <i>+industry response</i> | 331<br>(-15 to 818)  | 892<br>(222 to 1840)   | 78<br>(-21 to 278)  | 325<br>(125 to 664)  | 73<br>(13 to 175)  | 123<br>(25 to 302)   | 56<br>(11 to 129)  | 62<br>(18 to 135)   |
| Other              | <i>consumer behavior</i>  | 35<br>(11 to 86)     | 96<br>(3 to 285)       | 15<br>(-9 to 56)    | 35<br>(1 to 83)      | 13<br>(-2 to 38)   | 36<br>(13 to 77)     | 8<br>(-2 to 28)    | 18<br>(2 to 45)     |
|                    | <i>+industry response</i> | 73<br>(27 to 156)    | 177<br>(63 to 424)     | 28<br>(5 to 79)     | 60<br>(23 to 122)    | 24<br>(7 to 56)    | 52<br>(27 to 106)    | 18<br>(5 to 44)    | 30<br>(12 to 63)    |
|                    |                           |                      |                        |                     |                      |                    |                      |                    |                     |
| <b>Pancreatic</b>  |                           |                      |                        |                     |                      |                    |                      |                    |                     |
| Age                | <i>consumer behavior</i>  | 698 (402 to 1080)    |                        | 207 (61 to 421)     |                      | 290 (149 to 498)   |                      | 251 (140 to 429)   |                     |
|                    | <i>+industry response</i> | 1450 (954 to 2070)   |                        | 550 (306 to 883)    |                      | 591 (368 to 914)   |                      | 510 (295 to 793)   |                     |
| Race/Ethnicity     |                           |                      |                        |                     |                      |                    |                      |                    |                     |
| Non-Hispanic White | <i>consumer behavior</i>  | 114<br>(7 to 324)    | 311<br>(153 to 652)    | 27<br>(-50 to 152)  | 95<br>(10 to 273)    | 76<br>(6 to 224)   | 117<br>(30 to 295)   | 97<br>(38 to 224)  | 91<br>(23 to 216)   |
|                    | <i>+industry response</i> | 302<br>(85 to 648)   | 558<br>(267 to 1070)   | 122<br>(-4 to 310)  | 228<br>(64 to 500)   | 181<br>(45 to 396) | 235<br>(76 to 490)   | 201<br>(77 to 414) | 193<br>(55 to 387)  |
| Non-Hispanic Black | <i>consumer behavior</i>  | 50<br>(-6 to 157)    | 38<br>(2 to 106)       | -3<br>(-24 to 42)   | 20<br>(4 to 54)      | 23<br>(5 to 55)    | 16<br>(7 to 34)      | 15<br>(4 to 39)    | 10<br>(3 to 20)     |
|                    | <i>+industry response</i> | 114<br>(27 to 263)   | 84<br>(23 to 185)      | 25<br>(-10 to 91)   | 38<br>(14 to 83)     | 44<br>(17 to 92)   | 31<br>(12 to 60)     | 33<br>(10 to 73)   | 18<br>(7 to 34)     |
| Hispanic           | <i>consumer behavior</i>  | 32<br>(-14 to 113)   | 67<br>(14 to 159)      | 6<br>(-12 to 45)    | 25<br>(7 to 58)      | 9<br>(0 to 28)     | 12<br>(-2 to 36)     | 8<br>(-1 to 24)    | 8<br>(2 to 18)      |
|                    | <i>+industry response</i> | 105<br>(7 to 248)    | 147<br>(35 to 309)     | 28<br>(0 to 86)     | 50<br>(18 to 101)    | 25<br>(5 to 57)    | 27<br>(6 to 60)      | 21<br>(5 to 45)    | 15<br>(5 to 31)     |
| Other              | <i>consumer behavior</i>  | 15<br>(5 to 36)      | 19<br>(-1 to 61)       | 6<br>(-5 to 23)     | 8<br>(2 to 19)       | 6<br>(-1 to 19)    | 9<br>(3 to 18)       | 4<br>(-1 to 13)    | 4<br>(0 to 11)      |
|                    | <i>+industry response</i> | 31<br>(11 to 63)     | 36<br>(13 to 86)       | 12<br>(2 to 32)     | 14<br>(6 to 28)      | 11<br>(4 to 27)    | 13<br>(7 to 25)      | 9<br>(3 to 20)     | 7<br>(3 to 15)      |
|                    |                           |                      |                        |                     |                      |                    |                      |                    |                     |

|                                  |                           |                     |                       |                    |                     |                    |                     |                    |                    |
|----------------------------------|---------------------------|---------------------|-----------------------|--------------------|---------------------|--------------------|---------------------|--------------------|--------------------|
| <b>Esophageal Adenocarcinoma</b> |                           |                     |                       |                    |                     |                    |                     |                    |                    |
| Age                              | <i>consumer behavior</i>  | 871 (587 to 1400)   |                       | 230 (72 to 496)    |                     | 265 (119 to 537)   |                     | 204 (93 to 402)    |                    |
|                                  | <i>+industry response</i> | 1530 (1010 to 2300) |                       | 545 (260 to 945)   |                     | 523 (281 to 909)   |                     | 421 (194 to 724)   |                    |
| Race/Ethnicity                   |                           |                     |                       |                    |                     |                    |                     |                    |                    |
| Non-Hispanic White               | <i>consumer behavior</i>  | 50<br>(4 to 127)    | 679<br>(412 to 1180)  | 15<br>(-16 to 63)  | 161<br>(13 to 422)  | 29<br>(3 to 78)    | 194<br>(61 to 465)  | 32<br>(11 to 73)   | 149<br>(41 to 339) |
|                                  | <i>+industry response</i> | 128<br>(39 to 249)  | 1100<br>(601 to 1840) | 54<br>(5 to 122)   | 385<br>(117 to 775) | 67<br>(21 to 138)  | 385<br>(147 to 757) | 68<br>(24 to 129)  | 309<br>(89 to 605) |
| Non-Hispanic Black               | <i>consumer behavior</i>  | 8<br>(-1 to 23)     | 15<br>(1 to 40)       | 0<br>(-3 to 7)     | 8<br>(2 to 20)      | 4<br>(1 to 9)      | 5<br>(2 to 11)      | 2<br>(1 to 6)      | 4<br>(1 to 8)      |
|                                  | <i>+industry response</i> | 18<br>(5 to 39)     | 32<br>(10 to 68)      | 4<br>(-1 to 14)    | 15<br>(6 to 31)     | 7<br>(3 to 15)     | 11<br>(4 to 19)     | 5<br>(2 to 11)     | 7<br>(3 to 13)     |
| Hispanic                         | <i>consumer behavior</i>  | 13<br>(-5 to 42)    | 74<br>(17 to 168)     | 1<br>(-6 to 13)    | 32<br>(13 to 64)    | 3<br>(0 to 9)      | 12<br>(-2 to 36)    | 2<br>(0 to 7)      | 7<br>(2 to 17)     |
|                                  | <i>+industry response</i> | 42<br>(4 to 88)     | 162<br>(39 to 310)    | 9<br>(-2 to 27)    | 59<br>(24 to 107)   | 8<br>(2 to 17)     | 26<br>(6 to 60)     | 6<br>(2 to 14)     | 15<br>(5 to 29)    |
| Other                            | <i>consumer behavior</i>  | 6<br>(2 to 13)      | 13<br>(1 to 34)       | 2<br>(-2 to 8)     | 5<br>(1 to 11)      | 2<br>(0 to 6)      | 5<br>(1 to 10)      | 1<br>(0 to 4)      | 2<br>(0 to 6)      |
|                                  | <i>+industry response</i> | 12<br>(5 to 23)     | 23<br>(9 to 49)       | 4<br>(1 to 11)     | 8<br>(3 to 15)      | 4<br>(1 to 8)      | 7<br>(3 to 13)      | 3<br>(1 to 6)      | 4<br>(1 to 9)      |
| Colorectal                       |                           |                     |                       |                    |                     |                    |                     |                    |                    |
| Age                              | <i>consumer behavior</i>  | 643 (433 to 934)    |                       | 148 (54 to 281)    |                     | 204 (112 to 349)   |                     | 188 (106 to 317)   |                    |
|                                  | <i>+industry response</i> | 1200 (812 to 1690)  |                       | 365 (209 to 589)   |                     | 403 (255 to 638)   |                     | 380 (219 to 599)   |                    |
| Race/Ethnicity                   |                           |                     |                       |                    |                     |                    |                     |                    |                    |
| Non-Hispanic White               | <i>consumer behavior</i>  | 84<br>(2 to 269)    | 334<br>(213 to 577)   | 18<br>(-27 to 112) | 59<br>(2 to 169)    | 52<br>(3 to 155)   | 83<br>(30 to 204)   | 77<br>(29 to 175)  | 64<br>(16 to 152)  |
|                                  | <i>+industry response</i> | 216<br>(42 to 540)  | 521<br>(278 to 893)   | 78<br>(-4 to 220)  | 142<br>(33 to 328)  | 123<br>(30 to 284) | 158<br>(60 to 335)  | 161<br>(58 to 324) | 133<br>(38 to 284) |
| Non-Hispanic Black               | <i>consumer behavior</i>  | 24<br>(-4 to 87)    | 33<br>(2 to 100)      | -3<br>(-14 to 21)  | 16<br>(3 to 44)     | 13<br>(3 to 33)    | 13<br>(5 to 29)     | 9<br>(2 to 27)     | 9<br>(3 to 21)     |
|                                  | <i>+industry response</i> | 59<br>(10 to 156)   | 73<br>(18 to 173)     | 11<br>(-9 to 50)   | 30<br>(10 to 70)    | 25<br>(8 to 56)    | 26<br>(9 to 53)     | 20<br>(6 to 49)    | 17<br>(6 to 34)    |
| Hispanic                         | <i>consumer behavior</i>  | 27<br>(-4 to 93)    | 62<br>(11 to 161)     | 2<br>(-9 to 30)    | 27<br>(11 to 57)    | 7<br>(0 to 20)     | 10<br>(-2 to 34)    | 5<br>(-1 to 17)    | 7<br>(2 to 17)     |
|                                  | <i>+industry response</i> | 75<br>(10 to 189)   | 136<br>(28 to 301)    | 17<br>(-3 to 58)   | 49<br>(19 to 98)    | 16<br>(3 to 39)    | 23<br>(5 to 57)     | 14<br>(2 to 33)    | 15<br>(5 to 30)    |

|                         |                           |                     |                    |                    |                   |                  |                    |                   |                   |
|-------------------------|---------------------------|---------------------|--------------------|--------------------|-------------------|------------------|--------------------|-------------------|-------------------|
| Other                   | <i>consumer behavior</i>  | 12<br>(4 to 29)     | 24<br>(0 to 68)    | 4<br>(-4 to 16)    | 8<br>(0 to 18)    | 4<br>(-1 to 13)  | 7<br>(2 to 16)     | 3<br>(0 to 10)    | 4<br>(0 to 10)    |
|                         | <i>+industry response</i> | 25<br>(8 to 53)     | 43<br>(17 to 100)  | 8<br>(1 to 23)     | 13<br>(5 to 27)   | 7<br>(2 to 18)   | 11<br>(5 to 21)    | 6<br>(2 to 15)    | 7<br>(3 to 15)    |
| <b>Thyroid</b>          |                           |                     |                    |                    |                   |                  |                    |                   |                   |
| Age                     | <i>consumer behavior</i>  | 392 (205 to 690)    |                    | 57 (-4 to 165)     |                   | 76 (37 to 143)   |                    | 58 (27 to 111)    |                   |
|                         | <i>+industry response</i> | 846 (479 to 1360)   |                    | 177 (72 to 365)    |                   | 155 (79 to 269)  |                    | 120 (57 to 216)   |                   |
| <b>Race/Ethnicity</b>   |                           |                     |                    |                    |                   |                  |                    |                   |                   |
| Non-Hispanic White      | <i>consumer behavior</i>  | 105<br>(-17 to 368) | 122<br>(68 to 248) | 11<br>(-27 to 107) | 19<br>(-1 to 66)  | 26<br>(0 to 90)  | 24<br>(9 to 64)    | 26<br>(4 to 77)   | 16<br>(4 to 40)   |
|                         | <i>+industry response</i> | 282<br>(7 to 709)   | 204<br>(81 to 415) | 62<br>(-16 to 219) | 48<br>(4 to 128)  | 62<br>(5 to 174) | 44<br>(15 to 107)  | 59<br>(8 to 145)  | 32<br>(7 to 74)   |
| Non-Hispanic Black      | <i>consumer behavior</i>  | 28<br>(-4 to 120)   | 7<br>(0 to 25)     | 4<br>(-4 to 26)    | 2<br>(0 to 8)     | 6<br>(1 to 18)   | 2<br>(1 to 4)      | 4<br>(1 to 12)    | 1<br>(0 to 3)     |
|                         | <i>+industry response</i> | 67<br>(1 to 211)    | 15<br>(2 to 45)    | 14<br>(-4 to 49)   | 5<br>(1 to 14)    | 12<br>(2 to 31)  | 3<br>(1 to 8)      | 8<br>(1 to 21)    | 2<br>(1 to 5)     |
| Hispanic                | <i>consumer behavior</i>  | 33<br>(-21 to 150)  | 21<br>(3 to 58)    | -6<br>(-17 to 28)  | 6<br>(2 to 15)    | 4<br>(-1 to 15)  | 2<br>(0 to 8)      | 3<br>(0 to 12)    | 1<br>(0 to 3)     |
|                         | <i>+industry response</i> | 108<br>(-12 to 335) | 45<br>(7 to 108)   | 9<br>(-15 to 60)   | 12<br>(3 to 27)   | 10<br>(0 to 30)  | 5<br>(1 to 14)     | 8<br>(1 to 23)    | 3<br>(1 to 6)     |
| Other                   | <i>consumer behavior</i>  | 22<br>(5 to 59)     | 15<br>(4 to 39)    | 3<br>(-4 to 20)    | 3<br>(1 to 8)     | 3<br>(0 to 10)   | 2<br>(0 to 5)      | 2<br>(0 to 6)     | 1<br>(0 to 3)     |
|                         | <i>+industry response</i> | 46<br>(10 to 111)   | 24<br>(10 to 57)   | 8<br>(0 to 28)     | 5<br>(2 to 12)    | 5<br>(1 to 15)   | 3<br>(1 to 6)      | 3<br>(1 to 9)     | 2<br>(1 to 4)     |
| <b>Multiple Myeloma</b> |                           |                     |                    |                    |                   |                  |                    |                   |                   |
| Age                     | <i>consumer behavior</i>  | 289 (128 to 511)    |                    | 98 (28 to 212)     |                   | 148 (85 to 263)  |                    | 106 (54 to 193)   |                   |
|                         | <i>+industry response</i> | 648 (340 to 1030)   |                    | 252 (123 to 444)   |                   | 283 (170 to 473) |                    | 215 (111 to 370)  |                   |
| <b>Race/Ethnicity</b>   |                           |                     |                    |                    |                   |                  |                    |                   |                   |
| Non-Hispanic White      | <i>consumer behavior</i>  | 37<br>(-12 to 147)  | 91<br>(24 to 270)  | 17<br>(-9 to 81)   | 36<br>(0 to 134)  | 26<br>(0 to 95)  | 65<br>(29 to 158)  | 33<br>(9 to 90)   | 35<br>(5 to 109)  |
|                         | <i>+industry response</i> | 103<br>(-7 to 297)  | 192<br>(44 to 509) | 50<br>(-7 to 158)  | 91<br>(13 to 255) | 63<br>(6 to 168) | 115<br>(43 to 256) | 67<br>(17 to 167) | 76<br>(12 to 192) |
| Non-Hispanic Black      | <i>consumer behavior</i>  | 34<br>(-5 to 137)   | 33<br>(0 to 115)   | -5<br>(-20 to 36)  | 18<br>(4 to 53)   | 18<br>(6 to 52)  | 12<br>(2 to 33)    | 10<br>(1 to 31)   | 10<br>(4 to 24)   |
|                         | <i>+industry response</i> | 80<br>(1 to 243)    | 72<br>(10 to 202)  | 14<br>(-18 to 73)  | 35<br>(11 to 86)  | 35<br>(9 to 86)  | 24<br>(4 to 63)    | 22<br>(3 to 59)   | 18<br>(6 to 41)   |

|                                 |                           |                    |                     |                   |                    |                  |                    |                  |                    |
|---------------------------------|---------------------------|--------------------|---------------------|-------------------|--------------------|------------------|--------------------|------------------|--------------------|
| Hispanic                        | <i>consumer behavior</i>  | 2<br>(-19 to 49)   | 37<br>(5 to 111)    | -5<br>(-12 to 15) | 12<br>(3 to 37)    | 4<br>(-1 to 13)  | 6<br>(-2 to 23)    | 2<br>(-1 to 12)  | 4<br>(1 to 11)     |
|                                 | <i>+industry response</i> | 32<br>(-18 to 122) | 82<br>(9 to 213)    | 5<br>(-9 to 38)   | 26<br>(6 to 68)    | 10<br>(0 to 25)  | 14<br>(2 to 41)    | 7<br>(0 to 23)   | 8<br>(2 to 20)     |
| Other                           | <i>consumer behavior</i>  | 4<br>(1 to 12)     | 11<br>(3 to 32)     | 2<br>(-1 to 7)    | 3<br>(0 to 9)      | 2<br>(0 to 5)    | 4<br>(2 to 9)      | 1<br>(0 to 3)    | 2<br>(0 to 5)      |
|                                 | <i>+industry response</i> | 9<br>(1 to 21)     | 19<br>(7 to 48)     | 3<br>(0 to 10)    | 6<br>(2 to 14)     | 3<br>(1 to 8)    | 5<br>(3 to 12)     | 2<br>(0 to 6)    | 3<br>(1 to 7)      |
| <b>Stomach (Gastric Cardia)</b> |                           |                    |                     |                   |                    |                  |                    |                  |                    |
| Age                             | <i>consumer behavior</i>  | 370 (237 to 666)   |                     | 87 (21 to 237)    |                    | 110 (46 to 253)  |                    | 90 (40 to 191)   |                    |
|                                 | <i>+industry response</i> | 665 (397 to 1150)  |                     | 227 (88 to 465)   |                    | 224 (102 to 442) |                    | 181 (81 to 347)  |                    |
| Race/Ethnicity                  |                           |                    |                     |                   |                    |                  |                    |                  |                    |
| Non-Hispanic White              | <i>consumer behavior</i>  | 25<br>(-2 to 87)   | 278<br>(165 to 552) | 1<br>(-15 to 35)  | 64<br>(6 to 213)   | 15<br>(1 to 48)  | 72<br>(15 to 206)  | 18<br>(6 to 44)  | 58<br>(14 to 161)  |
|                                 | <i>+industry response</i> | 66<br>(8 to 172)   | 443<br>(211 to 914) | 21<br>(-9 to 76)  | 159<br>(31 to 390) | 34<br>(6 to 89)  | 150<br>(38 to 369) | 37<br>(11 to 80) | 119<br>(25 to 290) |
| Non-Hispanic Black              | <i>consumer behavior</i>  | 5<br>(-1 to 22)    | 10<br>(0 to 32)     | 0<br>(-2 to 6)    | 5<br>(1 to 14)     | 2<br>(1 to 6)    | 3<br>(1 to 8)      | 1<br>(0 to 4)    | 2<br>(0 to 5)      |
|                                 | <i>+industry response</i> | 13<br>(2 to 37)    | 22<br>(4 to 56)     | 3<br>(-2 to 12)   | 9<br>(3 to 23)     | 4<br>(1 to 9)    | 7<br>(2 to 15)     | 3<br>(1 to 7)    | 4<br>(1 to 9)      |
| Hispanic                        | <i>consumer behavior</i>  | 2<br>(-8 to 26)    | 25<br>(4 to 72)     | -1<br>(-5 to 8)   | 9<br>(2 to 24)     | 2<br>(0 to 6)    | 4<br>(-1 to 15)    | 1<br>(0 to 5)    | 3<br>(1 to 8)      |
|                                 | <i>+industry response</i> | 18<br>(-6 to 61)   | 57<br>(9 to 133)    | 3<br>(-3 to 17)   | 19<br>(4 to 41)    | 4<br>(0 to 11)   | 9<br>(2 to 26)     | 3<br>(0 to 9)    | 6<br>(1 to 14)     |
| Other                           | <i>consumer behavior</i>  | 4<br>(1 to 11)     | 9<br>(0 to 26)      | 1<br>(-1 to 6)    | 2<br>(-1 to 7)     | 1<br>(0 to 5)    | 4<br>(2 to 9)      | 1<br>(0 to 3)    | 2<br>(0 to 5)      |
|                                 | <i>+industry response</i> | 8<br>(2 to 19)     | 16<br>(5 to 39)     | 3<br>(0 to 9)     | 5<br>(1 to 12)     | 2<br>(1 to 7)    | 6<br>(3 to 11)     | 2<br>(0 to 5)    | 3<br>(1 to 7)      |
| <b>Gallbladder</b>              |                           |                    |                     |                   |                    |                  |                    |                  |                    |
| Age                             | <i>consumer behavior</i>  | 148 (89 to 225)    |                     | 47 (17 to 84)     |                    | 62 (37 to 100)   |                    | 51 (30 to 83)    |                    |
|                                 | <i>+industry response</i> | 322 (220 to 445)   |                     | 118 (72 to 179)   |                    | 124 (81 to 184)  |                    | 103 (66 to 158)  |                    |
| Race/Ethnicity                  |                           |                    |                     |                   |                    |                  |                    |                  |                    |
| Non-Hispanic White              | <i>consumer behavior</i>  | 23<br>(0 to 66)    | 38<br>(25 to 66)    | 10<br>(-7 to 42)  | 8<br>(1 to 23)     | 18<br>(2 to 52)  | 13<br>(5 to 30)    | 22<br>(8 to 52)  | 9<br>(2 to 21)     |
|                                 | <i>+industry response</i> | 63<br>(16 to 139)  | 59<br>(34 to 104)   | 32<br>(4 to 79)   | 20<br>(5 to 44)    | 41<br>(12 to 95) | 24<br>(9 to 48)    | 44<br>(17 to 97) | 19<br>(5 to 37)    |

|                          |                           |                   |                     |                  |                   |                 |                   |                 |                   |
|--------------------------|---------------------------|-------------------|---------------------|------------------|-------------------|-----------------|-------------------|-----------------|-------------------|
| Non-Hispanic Black       | <i>consumer behavior</i>  | 23<br>(-3 to 74)  | 8<br>(0 to 22)      | 2<br>(-7 to 24)  | 4<br>(1 to 10)    | 10<br>(3 to 24) | 3<br>(1 to 7)     | 6<br>(2 to 16)  | 2<br>(0 to 5)     |
|                          | <i>+industry response</i> | 52<br>(13 to 126) | 17<br>(5 to 38)     | 15<br>(-1 to 44) | 7<br>(3 to 16)    | 20<br>(7 to 40) | 6<br>(2 to 12)    | 13<br>(4 to 29) | 4<br>(1 to 8)     |
| Hispanic                 | <i>consumer behavior</i>  | 14<br>(-8 to 56)  | 19<br>(4 to 49)     | 2<br>(-6 to 21)  | 9<br>(4 to 18)    | 4<br>(0 to 13)  | 4<br>(0 to 13)    | 4<br>(0 to 11)  | 2<br>(1 to 5)     |
|                          | <i>+industry response</i> | 48<br>(4 to 119)  | 42<br>(10 to 93)    | 13<br>(-1 to 41) | 16<br>(6 to 32)   | 11<br>(2 to 27) | 8<br>(2 to 21)    | 9<br>(2 to 22)  | 5<br>(2 to 10)    |
| Other                    | <i>consumer behavior</i>  | 7<br>(2 to 17)    | 5<br>(1 to 12)      | 3<br>(-2 to 10)  | 1<br>(0 to 4)     | 2<br>(0 to 7)   | 2<br>(1 to 4)     | 2<br>(0 to 5)   | 1<br>(0 to 2)     |
|                          | <i>+industry response</i> | 15<br>(6 to 31)   | 8<br>(3 to 18)      | 5<br>(1 to 14)   | 3<br>(1 to 5)     | 4<br>(1 to 11)  | 3<br>(2 to 5)     | 3<br>(1 to 8)   | 2<br>(1 to 3)     |
| <b>Advanced Prostate</b> |                           |                   |                     |                  |                   |                 |                   |                 |                   |
| Age                      | <i>consumer behavior</i>  | 190 (125 to 325)  |                     | 63 (24 to 138)   |                   | 70 (34 to 144)  |                   | 50 (19 to 112)  |                   |
|                          | <i>+industry response</i> | 330 (201 to 539)  |                     | 135 (64 to 257)  |                   | 133 (65 to 240) |                   | 105 (39 to 200) |                   |
| Race/Ethnicity           |                           |                   |                     |                  |                   |                 |                   |                 |                   |
| Non-Hispanic White       | <i>consumer behavior</i>  | 0                 | 130<br>(80 to 239)  | 0                | 32<br>(1 to 104)  | 0               | 50<br>(17 to 122) | 0               | 37<br>(7 to 99)   |
|                          | <i>+industry response</i> | 0                 | 204<br>(103 to 381) | 0                | 79<br>(18 to 201) | 0               | 95<br>(31 to 201) | 0               | 78<br>(19 to 177) |
| Non-Hispanic Black       | <i>consumer behavior</i>  | 0                 | 26<br>(1 to 87)     | 0                | 15<br>(3 to 41)   | 0               | 11<br>(4 to 26)   | 0               | 8<br>(3 to 19)    |
|                          | <i>+industry response</i> | 0                 | 59<br>(14 to 145)   | 0                | 28<br>(10 to 67)  | 0               | 22<br>(8 to 48)   | 0               | 15<br>(6 to 31)   |
| Hispanic                 | <i>consumer behavior</i>  | 0                 | 20<br>(4 to 52)     | 0                | 10<br>(4 to 21)   | 0               | 4<br>(-1 to 15)   | 0               | 3<br>(1 to 8)     |
|                          | <i>+industry response</i> | 0                 | 44<br>(11 to 99)    | 0                | 18<br>(7 to 36)   | 0               | 9<br>(2 to 24)    | 0               | 6<br>(2 to 14)    |
| Other                    | <i>consumer behavior</i>  | 0                 | 6<br>(1 to 18)      | 0                | 3<br>(0 to 6)     | 0               | 3<br>(1 to 7)     | 0               | 1<br>(0 to 4)     |
|                          | <i>+industry response</i> | 0                 | 12<br>(5 to 27)     | 0                | 4<br>(2 to 9)     | 0               | 4<br>(2 to 9)     | 0               | 3<br>(1 to 6)     |
| <b>Ovarian</b>           |                           |                   |                     |                  |                   |                 |                   |                 |                   |
| Age                      | <i>consumer behavior</i>  | 69 (4 to 174)     |                     | 5 (-22 to 69)    |                   | 33 (7 to 90)    |                   | 34 (11 to 90)   |                   |
|                          | <i>+industry response</i> | 175 (40 to 373)   |                     | 47 (-7 to 154)   |                   | 72 (17 to 166)  |                   | 73 (22 to 165)  |                   |
| Race/Ethnicity           |                           |                   |                     |                  |                   |                 |                   |                 |                   |

|                    |                           |                    |   |                    |   |                  |   |                   |   |
|--------------------|---------------------------|--------------------|---|--------------------|---|------------------|---|-------------------|---|
| Non-Hispanic White | <i>consumer behavior</i>  | 38<br>(-14 to 138) | 0 | 6<br>(-17 to 68)   | 0 | 22<br>(-2 to 77) | 0 | 28<br>(7 to 84)   | 0 |
|                    | <i>+industry response</i> | 98<br>(-20 to 275) | 0 | 34<br>(-14 to 134) | 0 | 51<br>(0 to 142) | 0 | 59<br>(10 to 149) | 0 |
| Non-Hispanic Black | <i>consumer behavior</i>  | 9<br>(-3 to 40)    | 0 | -2<br>(-7 to 10)   | 0 | 5<br>(1 to 15)   | 0 | 3<br>(0 to 8)     | 0 |
|                    | <i>+industry response</i> | 21<br>(-4 to 71)   | 0 | 3<br>(-7 to 22)    | 0 | 9<br>(1 to 25)   | 0 | 6<br>(1 to 16)    | 0 |
| Hispanic           | <i>consumer behavior</i>  | 7<br>(-12 to 48)   | 0 | -3<br>(-9 to 12)   | 0 | 3<br>(0 to 10)   | 0 | 2<br>(-1 to 8)    | 0 |
|                    | <i>+industry response</i> | 30<br>(-15 to 107) | 0 | 3<br>(-9 to 27)    | 0 | 7<br>(0 to 19)   | 0 | 5<br>(-1 to 16)   | 0 |
| Other              | <i>consumer behavior</i>  | 7<br>(1 to 19)     | 0 | 2<br>(-2 to 10)    | 0 | 2<br>(0 to 6)    | 0 | 1<br>(0 to 4)     | 0 |
|                    | <i>+industry response</i> | 15<br>(1 to 36)    | 0 | 4<br>(0 to 14)     | 0 | 3<br>(1 to 9)    | 0 | 2<br>(0 to 6)     | 0 |

<sup>a</sup> Values are the median estimates (95% uncertainty intervals) of each distribution of 1000 simulations.



**eTable 15. Estimated cancer deaths reduced by Nutrition Facts added sugar labeling policy in the US by age, gender, race/ethnicity, and cancer type over a lifetime (US population=235,162,844)<sup>a</sup>**

| Cancer Type                    | Policy Scenario           | 20-44 y                |                        | 45-54 y             |                      | 55-64 y             |                      | 65 + y              |                    |
|--------------------------------|---------------------------|------------------------|------------------------|---------------------|----------------------|---------------------|----------------------|---------------------|--------------------|
|                                |                           | Female                 | Male                   | Female              | Male                 | Female              | Male                 | Female              | Male               |
| <b>Breast (Postmenopausal)</b> |                           |                        |                        |                     |                      |                     |                      |                     |                    |
| Age                            | <i>consumer behavior</i>  | 2410 (842 to 4700)     |                        | 160 (-115 to 560)   |                      | 275 (111 to 552)    |                      | 205 (91 to 387)     |                    |
|                                | <i>+industry response</i> | 5990 (3180 to 9790)    |                        | 625 (236 to 1230)   |                      | 610 (314 to 1000)   |                      | 432 (221 to 737)    |                    |
| Race/Ethnicity                 |                           |                        |                        |                     |                      |                     |                      |                     |                    |
| Non-Hispanic White             | <i>consumer behavior</i>  | 1430<br>(142 to 3590)  | 0                      | 93<br>(-115 to 452) | 0                    | 164<br>(18 to 433)  | 0                    | 146<br>(51 to 333)  | 0                  |
|                                | <i>+industry response</i> | 3610<br>(1140 to 7310) | 0                      | 369<br>(29 to 884)  | 0                    | 389<br>(126 to 760) | 0                    | 307<br>(113 to 606) | 0                  |
| Non-Hispanic Black             | <i>consumer behavior</i>  | 434<br>(-61 to 1310)   | 0                      | 35<br>(-54 to 201)  | 0                    | 68<br>(16 to 157)   | 0                    | 33<br>(8 to 84)     | 0                  |
|                                | <i>+industry response</i> | 1010<br>(272 to 2290)  | 0                      | 152<br>(5 to 392)   | 0                    | 131<br>(49 to 265)  | 0                    | 72<br>(22 to 152)   | 0                  |
| Hispanic                       | <i>consumer behavior</i>  | 249<br>(-136 to 874)   | 0                      | -4<br>(-55 to 101)  | 0                    | 22<br>(2 to 58)     | 0                    | 13<br>(-1 to 40)    | 0                  |
|                                | <i>+industry response</i> | 855<br>(77 to 1880)    | 0                      | 60<br>(-24 to 209)  | 0                    | 54<br>(13 to 113)   | 0                    | 35<br>(8 to 76)     | 0                  |
| Other                          | <i>consumer behavior</i>  | 186<br>(61 to 402)     | 0                      | 12<br>(-14 to 57)   | 0                    | 11<br>(-2 to 34)    | 0                    | 6<br>(-1 to 18)     | 0                  |
|                                | <i>+industry response</i> | 389<br>(150 to 710)    | 0                      | 25<br>(1 to 76)     | 0                    | 21<br>(7 to 48)     | 0                    | 12<br>(4 to 28)     | 0                  |
|                                |                           |                        |                        |                     |                      |                     |                      |                     |                    |
| <b>Liver</b>                   |                           |                        |                        |                     |                      |                     |                      |                     |                    |
| Age                            | <i>consumer behavior</i>  | 2660 (1830 to 3980)    |                        | 750 (336 to 1350)   |                      | 606 (356 to 1010)   |                      | 388 (228 to 659)    |                    |
|                                | <i>+industry response</i> | 5040 (3640 to 7300)    |                        | 1720 (988 to 2680)  |                      | 1180 (778 to 1780)  |                      | 782 (468 to 1240)   |                    |
| Race/Ethnicity                 |                           |                        |                        |                     |                      |                     |                      |                     |                    |
| Non-Hispanic White             | <i>consumer behavior</i>  | 193<br>(25 to 550)     | 1430<br>(889 to 2630)  | 57<br>(-50 to 253)  | 275<br>(3 to 816)    | 86<br>(7 to 255)    | 264<br>(94 to 610)   | 89<br>(31 to 219)   | 157<br>(44 to 374) |
|                                | <i>+industry response</i> | 482<br>(138 to 1100)   | 2260<br>(1200 to 4270) | 196<br>(18 to 493)  | 673<br>(143 to 1550) | 201<br>(63 to 452)  | 493<br>(189 to 1020) | 184<br>(60 to 402)  | 322<br>(89 to 680) |
| Non-Hispanic Black             | <i>consumer behavior</i>  | 105<br>(-13 to 342)    | 264<br>(14 to 761)     | 19<br>(-24 to 107)  | 132<br>(22 to 360)   | 28<br>(5 to 76)     | 78<br>(27 to 170)    | 17<br>(5 to 45)     | 41<br>(14 to 89)   |

|                            |                           |                       |                      |                      |                     |                     |                    |                     |                    |
|----------------------------|---------------------------|-----------------------|----------------------|----------------------|---------------------|---------------------|--------------------|---------------------|--------------------|
|                            | <i>+industry response</i> | 243<br>(54 to 577)    | 575<br>(149 to 1260) | 74<br>(-1 to 195)    | 252<br>(94 to 575)  | 57<br>(20 to 126)   | 152<br>(52 to 300) | 36<br>(11 to 82)    | 75<br>(30 to 147)  |
| Hispanic                   | <i>consumer behavior</i>  | 73<br>(-61 to 301)    | 360<br>(86 to 857)   | 1<br>(-50 to 118)    | 160<br>(68 to 334)  | 25<br>(0 to 81)     | 48<br>(-11 to 156) | 19<br>(-2 to 58)    | 24<br>(4 to 64)    |
|                            | <i>+industry response</i> | 273<br>(-11 to 667)   | 797<br>(198 to 1630) | 69<br>(-19 to 243)   | 289<br>(111 to 586) | 63<br>(11 to 149)   | 107<br>(22 to 261) | 48<br>(9 to 112)    | 52<br>(15 to 114)  |
| Other                      | <i>consumer behavior</i>  | 29<br>(9 to 71)       | 86<br>(1 to 259)     | 12<br>(-9 to 47)     | 30<br>(1 to 71)     | 10<br>(-2 to 31)    | 30<br>(10 to 63)   | 7<br>(-1 to 23)     | 14<br>(1 to 35)    |
|                            | <i>+industry response</i> | 62<br>(23 to 130)     | 158<br>(56 to 383)   | 23<br>(4 to 66)      | 51<br>(20 to 104)   | 20<br>(6 to 46)     | 43<br>(22 to 85)   | 14<br>(4 to 35)     | 23<br>(9 to 50)    |
| <b>Endometrial</b>         |                           |                       |                      |                      |                     |                     |                    |                     |                    |
| Age                        | <i>consumer behavior</i>  | 1090 (410 to 2030)    |                      | 205 (-189 to 735)    |                     | 394 (161 to 764)    |                    | 357 (174 to 657)    |                    |
|                            | <i>+industry response</i> | 2670 (1570 to 4060)   |                      | 852 (311 to 1640)    |                     | 860 (445 to 1410)   |                    | 754 (402 to 1210)   |                    |
| <b>Race/Ethnicity</b>      |                           |                       |                      |                      |                     |                     |                    |                     |                    |
| Non-Hispanic White         | <i>consumer behavior</i>  | 489<br>(75 to 1200)   | 0                    | 157<br>(-142 to 593) | 0                   | 209<br>(23 to 550)  | 0                  | 242<br>(85 to 528)  | 0                  |
|                            | <i>+industry response</i> | 1230<br>(438 to 2320) | 0                    | 540<br>(52 to 1180)  | 0                   | 493<br>(158 to 988) | 0                  | 500<br>(183 to 953) | 0                  |
| Non-Hispanic Black         | <i>consumer behavior</i>  | 333<br>(-48 to 1000)  | 0                    | 3<br>(-129 to 233)   | 0                   | 118<br>(24 to 274)  | 0                  | 66<br>(18 to 161)   | 0                  |
|                            | <i>+industry response</i> | 776<br>(209 to 1690)  | 0                    | 174<br>(-40 to 488)  | 0                   | 234<br>(84 to 446)  | 0                  | 147<br>(48 to 283)  | 0                  |
| Hispanic                   | <i>consumer behavior</i>  | 140<br>(-63 to 466)   | 0                    | -1<br>(-74 to 143)   | 0                   | 34<br>(2 to 90)     | 0                  | 25<br>(-1 to 72)    | 0                  |
|                            | <i>+industry response</i> | 458<br>(44 to 1000)   | 0                    | 88<br>(-28 to 284)   | 0                   | 84<br>(21 to 173)   | 0                  | 65<br>(14 to 139)   | 0                  |
| Other                      | <i>consumer behavior</i>  | 63<br>(20 to 143)     | 0                    | 14<br>(-18 to 68)    | 0                   | 14<br>(-2 to 40)    | 0                  | 9<br>(-1 to 29)     | 0                  |
|                            | <i>+industry response</i> | 130<br>(50 to 247)    | 0                    | 32<br>(1 to 95)      | 0                   | 26<br>(8 to 58)     | 0                  | 19<br>(6 to 44)     | 0                  |
| <b>Kidney (Renal Cell)</b> |                           |                       |                      |                      |                     |                     |                    |                     |                    |
| Age                        | <i>consumer behavior</i>  | 1100 (743 to 1610)    |                      | 342 (136 to 620)     |                     | 365 (202 to 617)    |                    | 278 (158 to 465)    |                    |
|                            | <i>+industry response</i> | 2060 (1480 to 2870)   |                      | 820 (499 to 1230)    |                     | 733 (475 to 1070)   |                    | 570 (334 to 854)    |                    |
| <b>Race/Ethnicity</b>      |                           |                       |                      |                      |                     |                     |                    |                     |                    |
| Non-Hispanic White         | <i>consumer behavior</i>  | 63<br>(10 to 156)     | 589<br>(369 to 1020) | 37<br>(-38 to 150)   | 151<br>(7 to 390)   | 73<br>(8 to 197)    | 169<br>(51 to 396) | 87<br>(31 to 190)   | 118<br>(29 to 282) |

|                                  |                           |                    |                      |                    |                     |                    |                     |                    |                    |
|----------------------------------|---------------------------|--------------------|----------------------|--------------------|---------------------|--------------------|---------------------|--------------------|--------------------|
|                                  | <i>+industry response</i> | 158<br>(54 to 319) | 938<br>(523 to 1560) | 134<br>(11 to 293) | 364<br>(102 to 723) | 171<br>(54 to 341) | 335<br>(121 to 643) | 184<br>(67 to 342) | 248<br>(70 to 500) |
| Non-Hispanic Black               | <i>consumer behavior</i>  | 55<br>(-8 to 172)  | 106<br>(4 to 281)    | 2<br>(-21 to 43)   | 43<br>(10 to 108)   | 21<br>(4 to 50)    | 28<br>(11 to 57)    | 13<br>(3 to 33)    | 15<br>(4 to 31)    |
|                                  | <i>+industry response</i> | 127<br>(33 to 300) | 230<br>(69 to 496)   | 30<br>(-6 to 88)   | 81<br>(33 to 171)   | 41<br>(15 to 83)   | 55<br>(21 to 96)    | 30<br>(9 to 59)    | 27<br>(11 to 51)   |
| Hispanic                         | <i>consumer behavior</i>  | 48<br>(-27 to 158) | 137<br>(29 to 312)   | -1<br>(-21 to 37)  | 68<br>(24 to 140)   | 13<br>(1 to 34)    | 24<br>(-6 to 73)    | 10<br>(0 to 27)    | 14<br>(4 to 31)    |
|                                  | <i>+industry response</i> | 164<br>(14 to 345) | 307<br>(72 to 586)   | 24<br>(-7 to 75)   | 131<br>(48 to 234)  | 32<br>(8 to 67)    | 54<br>(12 to 119)   | 25<br>(5 to 53)    | 28<br>(10 to 52)   |
| Other                            | <i>consumer behavior</i>  | 15<br>(5 to 35)    | 35<br>(3 to 96)      | 4<br>(-4 to 18)    | 11<br>(1 to 24)     | 4<br>(-1 to 11)    | 12<br>(4 to 25)     | 3<br>(0 to 9)      | 5<br>(0 to 13)     |
|                                  | <i>+industry response</i> | 32<br>(12 to 63)   | 63<br>(24 to 140)    | 8<br>(1 to 25)     | 19<br>(7 to 35)     | 7<br>(2 to 17)     | 18<br>(9 to 34)     | 6<br>(2 to 14)     | 8<br>(3 to 18)     |
| <b>Pancreatic</b>                |                           |                    |                      |                    |                     |                    |                     |                    |                    |
| Age                              | <i>consumer behavior</i>  | 603 (350 to 927)   |                      | 187 (56 to 377)    |                     | 259 (133 to 443)   |                     | 217 (122 to 371)   |                    |
|                                  | <i>+industry response</i> | 1240 (816 to 1770) |                      | 495 (274 to 794)   |                     | 527 (330 to 815)   |                     | 444 (257 to 688)   |                    |
| <b>Race/Ethnicity</b>            |                           |                    |                      |                    |                     |                    |                     |                    |                    |
| Non-Hispanic White               | <i>consumer behavior</i>  | 100<br>(8 to 276)  | 268<br>(134 to 557)  | 26<br>(-44 to 137) | 85<br>(9 to 246)    | 69<br>(5 to 203)   | 104<br>(27 to 258)  | 86<br>(33 to 198)  | 77<br>(19 to 183)  |
|                                  | <i>+industry response</i> | 258<br>(76 to 557) | 480<br>(231 to 930)  | 111<br>(-2 to 282) | 204<br>(57 to 446)  | 164<br>(40 to 357) | 208<br>(68 to 430)  | 177<br>(67 to 364) | 163<br>(46 to 327) |
| Non-Hispanic Black               | <i>consumer behavior</i>  | 38<br>(-5 to 121)  | 34<br>(1 to 95)      | -3<br>(-22 to 39)  | 18<br>(4 to 48)     | 21<br>(5 to 49)    | 15<br>(6 to 31)     | 13<br>(3 to 35)    | 8<br>(2 to 18)     |
|                                  | <i>+industry response</i> | 90<br>(22 to 207)  | 75<br>(21 to 168)    | 23<br>(-9 to 83)   | 34<br>(13 to 75)    | 40<br>(15 to 83)   | 28<br>(11 to 54)    | 29<br>(9 to 64)    | 16<br>(6 to 29)    |
| Hispanic                         | <i>consumer behavior</i>  | 26<br>(-11 to 92)  | 60<br>(13 to 143)    | 5<br>(-11 to 40)   | 23<br>(7 to 53)     | 8<br>(0 to 25)     | 11<br>(-2 to 33)    | 7<br>(-1 to 22)    | 7<br>(2 to 15)     |
|                                  | <i>+industry response</i> | 84<br>(6 to 200)   | 133<br>(32 to 279)   | 25<br>(0 to 78)    | 46<br>(16 to 92)    | 23<br>(5 to 52)    | 24<br>(5 to 54)     | 19<br>(4 to 41)    | 14<br>(5 to 27)    |
| Other                            | <i>consumer behavior</i>  | 13<br>(4 to 30)    | 16<br>(-1 to 53)     | 5<br>(-4 to 19)    | 7<br>(1 to 17)      | 5<br>(-1 to 17)    | 8<br>(3 to 16)      | 4<br>(-1 to 11)    | 4<br>(0 to 9)      |
|                                  | <i>+industry response</i> | 26<br>(9 to 53)    | 31<br>(11 to 75)     | 10<br>(1 to 27)    | 12<br>(5 to 25)     | 10<br>(3 to 24)    | 11<br>(6 to 22)     | 8<br>(2 to 18)     | 6<br>(2 to 13)     |
| <b>Esophageal Adenocarcinoma</b> |                           |                    |                      |                    |                     |                    |                     |                    |                    |
| Age                              | <i>consumer behavior</i>  | 782 (526 to 1250)  |                      | 195 (61 to 419)    |                     | 217 (98 to 437)    |                     | 157 (72 to 309)    |                    |

|                    |                           |                    |                      |                   |                    |                   |                     |                   |                    |
|--------------------|---------------------------|--------------------|----------------------|-------------------|--------------------|-------------------|---------------------|-------------------|--------------------|
|                    | <i>+industry response</i> | 1370 (900 to 2070) |                      | 459 (215 to 802)  |                    | 427 (231 to 741)  |                     | 326 (152 to 556)  |                    |
| Race/Ethnicity     |                           |                    |                      |                   |                    |                   |                     |                   |                    |
| Non-Hispanic White | <i>consumer behavior</i>  | 45<br>(4 to 114)   | 616<br>(373 to 1070) | 13<br>(-13 to 55) | 136<br>(11 to 357) | 24<br>(2 to 62)   | 158<br>(49 to 380)  | 26<br>(8 to 59)   | 112<br>(31 to 260) |
|                    | <i>+industry response</i> | 116<br>(36 to 224) | 992<br>(543 to 1660) | 46<br>(5 to 105)  | 325<br>(99 to 655) | 55<br>(17 to 112) | 312<br>(119 to 619) | 55<br>(19 to 105) | 233<br>(67 to 461) |
| Non-Hispanic Black | <i>consumer behavior</i>  | 7<br>(-1 to 21)    | 14<br>(1 to 36)      | 0<br>(-3 to 6)    | 7<br>(2 to 17)     | 3<br>(1 to 7)     | 5<br>(2 to 9)       | 2<br>(0 to 5)     | 3<br>(1 to 6)      |
|                    | <i>+industry response</i> | 16<br>(4 to 35)    | 29<br>(9 to 61)      | 4<br>(-1 to 12)   | 13<br>(5 to 27)    | 6<br>(2 to 12)    | 9<br>(4 to 16)      | 4<br>(1 to 9)     | 5<br>(2 to 10)     |
| Hispanic           | <i>consumer behavior</i>  | 12<br>(-5 to 38)   | 63<br>(14 to 143)    | 0<br>(-4 to 9)    | 28<br>(11 to 56)   | 3<br>(0 to 8)     | 11<br>(-2 to 32)    | 2<br>(0 to 6)     | 6<br>(1 to 13)     |
|                    | <i>+industry response</i> | 38<br>(4 to 80)    | 137<br>(34 to 264)   | 3<br>(-1 to 18)   | 51<br>(20 to 93)   | 7<br>(2 to 15)    | 23<br>(6 to 53)     | 5<br>(1 to 12)    | 12<br>(4 to 24)    |
| Other              | <i>consumer behavior</i>  | 5<br>(2 to 12)     | 11<br>(1 to 29)      | 2<br>(-1 to 7)    | 4<br>(0 to 9)      | 2<br>(0 to 5)     | 4<br>(1 to 8)       | 1<br>(0 to 3)     | 2<br>(0 to 5)      |
|                    | <i>+industry response</i> | 11<br>(4 to 20)    | 19<br>(7 to 41)      | 3<br>(0 to 9)     | 6<br>(3 to 12)     | 3<br>(1 to 7)     | 6<br>(3 to 11)      | 2<br>(1 to 5)     | 3<br>(1 to 7)      |
|                    |                           |                    |                      |                   |                    |                   |                     |                   |                    |
| <b>Colorectal</b>  |                           |                    |                      |                   |                    |                   |                     |                   |                    |
| Age                | <i>consumer behavior</i>  | 464 (314 to 674)   |                      | 92.6 (33 to 172)  |                    | 121 (67 to 203)   |                     | 100 (56 to 168)   |                    |
|                    | <i>+industry response</i> | 872 (604 to 1220)  |                      | 231 (132 to 360)  |                    | 239 (152 to 375)  |                     | 203 (119 to 315)  |                    |
| Race/Ethnicity     |                           |                    |                      |                   |                    |                   |                     |                   |                    |
| Non-Hispanic White | <i>consumer behavior</i>  | 64<br>(6 to 189)   | 234<br>(150 to 399)  | 12<br>(-17 to 69) | 35<br>(0 to 100)   | 31<br>(2 to 91)   | 47<br>(17 to 113)   | 42<br>(15 to 94)  | 31<br>(8 to 75)    |
|                    | <i>+industry response</i> | 161<br>(43 to 377) | 367<br>(196 to 623)  | 50<br>(0 to 134)  | 85<br>(20 to 195)  | 74<br>(19 to 165) | 89<br>(34 to 189)   | 88<br>(32 to 176) | 65<br>(18 to 141)  |
| Non-Hispanic Black | <i>consumer behavior</i>  | 19<br>(-4 to 68)   | 25<br>(1 to 73)      | -2<br>(-10 to 15) | 11<br>(2 to 30)    | 9<br>(2 to 22)    | 9<br>(3 to 19)      | 5<br>(1 to 16)    | 5<br>(1 to 12)     |
|                    | <i>+industry response</i> | 47<br>(9 to 125)   | 54<br>(13 to 124)    | 9<br>(-6 to 35)   | 21<br>(7 to 47)    | 17<br>(5 to 36)   | 16<br>(6 to 33)     | 12<br>(3 to 29)   | 10<br>(4 to 20)    |
| Hispanic           | <i>consumer behavior</i>  | 21<br>(-3 to 71)   | 45<br>(8 to 114)     | 1<br>(-6 to 19)   | 18<br>(7 to 37)    | 4<br>(0 to 13)    | 6<br>(-1 to 20)     | 3<br>(0 to 10)    | 4<br>(1 to 10)     |
|                    | <i>+industry response</i> | 59<br>(9 to 144)   | 100<br>(21 to 218)   | 11<br>(-2 to 36)  | 32<br>(12 to 64)   | 10<br>(2 to 24)   | 14<br>(3 to 36)     | 8<br>(1 to 21)    | 9<br>(3 to 18)     |
| Other              | <i>consumer behavior</i>  | 9<br>(3 to 21)     | 17<br>(0 to 48)      | 2<br>(-2 to 9)    | 4<br>(0 to 10)     | 2<br>(0 to 7)     | 4<br>(1 to 9)       | 2<br>(0 to 5)     | 2<br>(0 to 5)      |
|                    | <i>+industry response</i> | 18<br>(6 to 37)    | 32<br>(12 to 71)     | 5<br>(0 to 13)    | 8<br>(3 to 15)     | 4<br>(1 to 10)    | 6<br>(3 to 12)      | 3<br>(1 to 8)     | 3<br>(1 to 7)      |
|                    |                           |                    |                      |                   |                    |                   |                     |                   |                    |

|                                 |                           |                   |                     |                   |                    |                  |                    |                   |                   |
|---------------------------------|---------------------------|-------------------|---------------------|-------------------|--------------------|------------------|--------------------|-------------------|-------------------|
| <b>Stomach (Gastric Cardia)</b> |                           |                   |                     |                   |                    |                  |                    |                   |                   |
| Age                             | <i>consumer behavior</i>  | 310 (199 to 566)  |                     | 74 (19 to 202)    |                    | 89 (38 to 206)   |                    | 68 (31 to 144)    |                   |
|                                 | <i>+industry response</i> | 553 (328 to 973)  |                     | 191 (74 to 393)   |                    | 182 (83 to 356)  |                    | 138 (62 to 265)   |                   |
| Race/Ethnicity                  |                           |                   |                     |                   |                    |                  |                    |                   |                   |
| Non-Hispanic White              | <i>consumer behavior</i>  | 20<br>(-2 to 70)  | 236<br>(141 to 473) | 1<br>(-11 to 29)  | 54<br>(5 to 182)   | 12<br>(1 to 39)  | 58<br>(12 to 169)  | 14<br>(5 to 34)   | 43<br>(10 to 122) |
|                                 | <i>+industry response</i> | 54<br>(7 to 137)  | 379<br>(181 to 764) | 17<br>(-7 to 63)  | 134<br>(27 to 331) | 28<br>(5 to 72)  | 121<br>(31 to 299) | 29<br>(9 to 63)   | 89<br>(19 to 220) |
| Non-Hispanic Black              | <i>consumer behavior</i>  | 4<br>(-1 to 17)   | 4<br>(0 to 21)      | 0<br>(-2 to 4)    | 4<br>(1 to 12)     | 2<br>(1 to 4)    | 3<br>(1 to 7)      | 1<br>(0 to 3)     | 1<br>(0 to 4)     |
|                                 | <i>+industry response</i> | 10<br>(1 to 30)   | 9<br>(0 to 39)      | 2<br>(-1 to 9)    | 8<br>(2 to 20)     | 3<br>(1 to 7)    | 6<br>(2 to 13)     | 2<br>(1 to 5)     | 3<br>(1 to 7)     |
| Hispanic                        | <i>consumer behavior</i>  | 2<br>(-8 to 24)   | 23<br>(3 to 64)     | -1<br>(-4 to 7)   | 8<br>(2 to 20)     | 1<br>(0 to 5)    | 3<br>(-1 to 12)    | 1<br>(0 to 4)     | 2<br>(1 to 6)     |
|                                 | <i>+industry response</i> | 17<br>(-5 to 56)  | 52<br>(9 to 119)    | 3<br>(-3 to 15)   | 16<br>(3 to 36)    | 4<br>(0 to 9)    | 8<br>(1 to 22)     | 3<br>(0 to 7)     | 5<br>(1 to 11)    |
| Other                           | <i>consumer behavior</i>  | 2<br>(0 to 7)     | 6<br>(0 to 19)      | 1<br>(-1 to 5)    | 2<br>(-1 to 6)     | 1<br>(0 to 4)    | 3<br>(1 to 7)      | 1<br>(0 to 2)     | 1<br>(0 to 4)     |
|                                 | <i>+industry response</i> | 5<br>(1 to 14)    | 11<br>(3 to 29)     | 2<br>(0 to 7)     | 4<br>(1 to 10)     | 2<br>(1 to 5)    | 5<br>(3 to 9)      | 1<br>(0 to 4)     | 2<br>(1 to 5)     |
| Multiple Myeloma                |                           |                   |                     |                   |                    |                  |                    |                   |                   |
| Age                             | <i>consumer behavior</i>  | 164 (82 to 292)   |                     | 60 (18 to 130)    |                    | 90 (53 to 158)   |                    | 69 (35 to 124)    |                   |
|                                 | <i>+industry response</i> | 364 (200 to 584)  |                     | 158 (81 to 275)   |                    | 173 (105 to 291) |                    | 140 (72 to 239)   |                   |
| Race/Ethnicity                  |                           |                   |                     |                   |                    |                  |                    |                   |                   |
| Non-Hispanic White              | <i>consumer behavior</i>  | 16<br>(-2 to 63)  | 57<br>(16 to 160)   | 10<br>(-6 to 48)  | 23<br>(0 to 82)    | 16<br>(0 to 57)  | 38<br>(17 to 91)   | 22<br>(6 to 60)   | 22<br>(3 to 70)   |
|                                 | <i>+industry response</i> | 43<br>(1 to 125)  | 116<br>(29 to 295)  | 31<br>(-3 to 94)  | 57<br>(8 to 154)   | 38<br>(5 to 103) | 67<br>(25 to 147)  | 44<br>(11 to 109) | 49<br>(8 to 124)  |
| Non-Hispanic Black              | <i>consumer behavior</i>  | 15<br>(-2 to 64)  | 22<br>(0 to 76)     | -3<br>(-13 to 24) | 11<br>(3 to 32)    | 11<br>(4 to 32)  | 7<br>(1 to 21)     | 7<br>(1 to 21)    | 6<br>(2 to 14)    |
|                                 | <i>+industry response</i> | 34<br>(3 to 117)  | 48<br>(7 to 135)    | 10<br>(-11 to 49) | 21<br>(7 to 53)    | 22<br>(6 to 54)  | 15<br>(3 to 39)    | 15<br>(2 to 40)   | 10<br>(4 to 24)   |
| Hispanic                        | <i>consumer behavior</i>  | 2<br>(-12 to 31)  | 24<br>(4 to 74)     | -3<br>(-8 to 10)  | 8<br>(2 to 23)     | 3<br>(-0 to 9)   | 4<br>(-1 to 16)    | 2<br>(-1 to 9)    | 3<br>(1 to 7)     |
|                                 | <i>+industry response</i> | 21<br>(-10 to 79) | 54<br>(7 to 140)    | 3<br>(-6 to 25)   | 17<br>(4 to 43)    | 7<br>(0 to 18)   | 9<br>(1 to 27)     | 6<br>(-0 to 17)   | 5<br>(1 to 13)    |

|                          |                           |                   |                    |                  |                 |                  |                 |                  |                 |
|--------------------------|---------------------------|-------------------|--------------------|------------------|-----------------|------------------|-----------------|------------------|-----------------|
| Other                    | <i>consumer behavior</i>  | 2<br>(0 to 6)     | 7<br>(1 to 20)     | 1<br>(-1 to 4)   | 2<br>(0 to 6)   | 1<br>(0 to 3)    | 3<br>(1 to 6)   | 1<br>(0 to 2)    | 1<br>(0 to 3)   |
|                          | <i>+industry response</i> | 4<br>(1 to 12)    | 12<br>(4 to 30)    | 2<br>(0 to 6)    | 4<br>(1 to 9)   | 2<br>(1 to 5)    | 4<br>(2 to 8)   | 1<br>(0 to 4)    | 2<br>(1 to 4)   |
| <b>Gallbladder</b>       |                           |                   |                    |                  |                 |                  |                 |                  |                 |
| Age                      | <i>consumer behavior</i>  | 126 (74 to 192)   |                    | 39 (13 to 72)    |                 | 53 (31 to 84)    |                 | 41 (24 to 67)    |                 |
|                          | <i>+industry response</i> | 275 (187 to 384)  |                    | 101 (61 to 156)  |                 | 106 (69 to 155)  |                 | 84 (53 to 127)   |                 |
| <b>Race/Ethnicity</b>    |                           |                   |                    |                  |                 |                  |                 |                  |                 |
| Non-Hispanic White       | <i>consumer behavior</i>  | 22<br>(0 to 63)   | 32<br>(21 to 55)   | 9<br>(-6 to 37)  | 7<br>(1 to 19)  | 15<br>(1 to 44)  | 11<br>(4 to 25) | 18<br>(6 to 42)  | 7<br>(2 to 17)  |
|                          | <i>+industry response</i> | 58<br>(16 to 130) | 50<br>(27 to 87)   | 28<br>(3 to 71)  | 16<br>(4 to 36) | 35<br>(10 to 79) | 20<br>(8 to 41) | 36<br>(14 to 79) | 15<br>(4 to 30) |
| Non-Hispanic Black       | <i>consumer behavior</i>  | 20<br>(-2 to 64)  | 6<br>(0 to 18)     | 2<br>(-6 to 21)  | 3<br>(0 to 7)   | 9<br>(2 to 21)   | 2<br>(1 to 5)   | 5<br>(1 to 12)   | 1<br>(0 to 3)   |
|                          | <i>+industry response</i> | 46<br>(12 to 110) | 13<br>(4 to 30)    | 13<br>(-1 to 40) | 6<br>(2 to 12)  | 17<br>(6 to 35)  | 5<br>(2 to 10)  | 10<br>(3 to 22)  | 3<br>(1 to 6)   |
| Hispanic                 | <i>consumer behavior</i>  | 13<br>(-7 to 48)  | 15<br>(3 to 38)    | 2<br>(-5 to 18)  | 8<br>(3 to 16)  | 4<br>(-0 to 12)  | 3<br>(0 to 11)  | 3<br>(0 to 10)   | 2<br>(1 to 4)   |
|                          | <i>+industry response</i> | 42<br>(3 to 101)  | 33<br>(8 to 74)    | 12<br>(-1 to 36) | 14<br>(6 to 28) | 10<br>(2 to 23)  | 7<br>(2 to 18)  | 8<br>(2 to 19)   | 4<br>(1 to 8)   |
| Other                    | <i>consumer behavior</i>  | 6<br>(2 to 15)    | 4<br>(0 to 10)     | 2<br>(-2 to 9)   | 1<br>(0 to 2)   | 2<br>(0 to 6)    | 2<br>(1 to 4)   | 1<br>(0 to 4)    | 1<br>(0 to 2)   |
|                          | <i>+industry response</i> | 13<br>(5 to 26)   | 6<br>(2 to 14)     | 4<br>(1 to 12)   | 1<br>(0 to 3)   | 4<br>(1 to 9)    | 3<br>(1 to 5)   | 3<br>(1 to 7)    | 1<br>(0 to 3)   |
| <b>Advanced Prostate</b> |                           |                   |                    |                  |                 |                  |                 |                  |                 |
| Age                      | <i>consumer behavior</i>  | 103 (64 to 179)   |                    | 26 (11 to 54)    |                 | 21 (10 to 41)    |                 | 21 (8 to 45)     |                 |
|                          | <i>+industry response</i> | 178 (108 to 302)  |                    | 54 (27 to 100)   |                 | 40 (21 to 70)    |                 | 44 (17 to 82)    |                 |
| <b>Race/Ethnicity</b>    |                           |                   |                    |                  |                 |                  |                 |                  |                 |
| Non-Hispanic White       | <i>consumer behavior</i>  | 0                 | 67<br>(38 to 134)  | 0                | 11<br>(0 to 37) | 0                | 13<br>(4 to 32) | 0                | 14<br>(3 to 39) |
|                          | <i>+industry response</i> | 0                 | 106<br>(54 to 214) | 0                | 28<br>(6 to 71) | 0                | 25<br>(8 to 52) | 0                | 31<br>(8 to 70) |
| Non-Hispanic Black       | <i>consumer behavior</i>  | 0                 | 13<br>(1 to 44)    | 0                | 6<br>(1 to 18)  | 0                | 4<br>(2 to 10)  | 0                | 4<br>(1 to 10)  |
|                          | <i>+industry response</i> | 0                 | 28<br>(6 to 80)    | 0                | 12<br>(4 to 28) | 0                | 9<br>(3 to 20)  | 0                | 8<br>(3 to 16)  |

|                       |                           |                   |                 |                  |                 |                  |                |                  |               |
|-----------------------|---------------------------|-------------------|-----------------|------------------|-----------------|------------------|----------------|------------------|---------------|
| Hispanic              | <i>consumer behavior</i>  | 0                 | 16<br>(3 to 41) | 0                | 6<br>(2 to 12)  | 0                | 2<br>(-1 to 6) | 0                | 1<br>(0 to 4) |
|                       | <i>+industry response</i> | 0                 | 34<br>(8 to 78) | 0                | 10<br>(4 to 21) | 0                | 4<br>(1 to 11) | 0                | 3<br>(1 to 7) |
| Other                 | <i>consumer behavior</i>  | 0                 | 2<br>(0 to 9)   | 0                | 1<br>(0 to 2)   | 0                | 1<br>(0 to 2)  | 0                | 1<br>(0 to 2) |
|                       | <i>+industry response</i> | 0                 | 4<br>(0 to 14)  | 0                | 1<br>(1 to 3)   | 0                | 1<br>(1 to 2)  | 0                | 1<br>(0 to 2) |
| <b>Ovarian</b>        |                           |                   |                 |                  |                 |                  |                |                  |               |
| Age                   | <i>consumer behavior</i>  | 47 (9 to 110)     |                 | 4 (-16 to 49)    |                 | 25 (6 to 65)     |                | 26 (8 to 67)     |               |
|                       | <i>+industry response</i> | 118 (36 to 236)   |                 | 36 (-2 to 112)   |                 | 55 (16 to 120)   |                | 56 (17 to 125)   |               |
| <b>Race/Ethnicity</b> |                           |                   |                 |                  |                 |                  |                |                  |               |
| Non-Hispanic White    | <i>consumer behavior</i>  | 25<br>(-4 to 82)  | 0               | 5<br>(-11 to 50) | 0               | 16<br>(-1 to 56) | 0              | 21<br>(5 to 62)  | 0             |
|                       | <i>+industry response</i> | 64<br>(-3 to 167) | 0               | 26<br>(-8 to 96) | 0               | 38<br>(2 to 102) | 0              | 45<br>(9 to 111) | 0             |
| Non-Hispanic Black    | <i>consumer behavior</i>  | 6<br>(-2 to 28)   | 0               | -2<br>(-5 to 8)  | 0               | 4<br>(1 to 12)   | 0              | 2<br>(0 to 7)    | 0             |
|                       | <i>+industry response</i> | 15<br>(-1 to 48)  | 0               | 3<br>(-5 to 18)  | 0               | 7<br>(2 to 20)   | 0              | 5<br>(1 to 13)   | 0             |
| Hispanic              | <i>consumer behavior</i>  | 6<br>(-7 to 35)   | 0               | -2<br>(-6 to 9)  | 0               | 2<br>(0 to 8)    | 0              | 1<br>(-1 to 7)   | 0             |
|                       | <i>+industry response</i> | 22<br>(-7 to 76)  | 0               | 2<br>(-6 to 20)  | 0               | 6<br>(0 to 15)   | 0              | 4<br>(-1 to 13)  | 0             |
| Other                 | <i>consumer behavior</i>  | 5<br>(1 to 13)    | 0               | 1<br>(-2 to 7)   | 0               | 1<br>(0 to 4)    | 0              | 1<br>(0 to 3)    | 0             |
|                       | <i>+industry response</i> | 10<br>(1 to 25)   | 0               | 3<br>(0 to 10)   | 0               | 2<br>(1 to 6)    | 0              | 1<br>(0 to 5)    | 0             |
| <b>Thyroid</b>        |                           |                   |                 |                  |                 |                  |                |                  |               |
| Age                   | <i>consumer behavior</i>  | 8 (3 to 16)       |                 | 4 (1 to 11)      |                 | 5 (3 to 10)      |                | 7 (3 to 11)      |               |
|                       | <i>+industry response</i> | 17 (7 to 32)      |                 | 11 (4 to 22)     |                 | 10 (6 to 17)     |                | 13 (8 to 22)     |               |
| <b>Race/Ethnicity</b> |                           |                   |                 |                  |                 |                  |                |                  |               |
| Non-Hispanic White    | <i>consumer behavior</i>  | 0<br>(0 to 3)     | 1<br>(0 to 7)   | 0<br>(0 to 2)    | 2<br>(0 to 7)   | 0<br>(0 to 2)    | 2<br>(1 to 6)  | 2<br>(0 to 6)    | 1<br>(0 to 4) |
|                       | <i>+industry response</i> | 0<br>(0 to 6)     | 2<br>(0 to 11)  | 1<br>(0 to 4)    | 5<br>(1 to 14)  | 1<br>(0 to 3)    | 4<br>(1 to 11) | 4<br>(1 to 11)   | 3<br>(1 to 7) |

|                    |                           |                |               |                |               |               |               |               |               |
|--------------------|---------------------------|----------------|---------------|----------------|---------------|---------------|---------------|---------------|---------------|
| Non-Hispanic Black | <i>consumer behavior</i>  | 1<br>(0 to 5)  | 1<br>(0 to 5) | 0<br>(0 to 1)  | 0<br>(0 to 1) | 0<br>(0 to 2) | 0<br>(0 to 1) | 1<br>(0 to 2) | 0<br>(0 to 1) |
|                    | <i>+industry response</i> | 2<br>(0 to 10) | 3<br>(0 to 9) | 0<br>(0 to 3)  | 0<br>(0 to 2) | 1<br>(0 to 3) | 0<br>(0 to 1) | 1<br>(0 to 4) | 0<br>(0 to 1) |
| Hispanic           | <i>consumer behavior</i>  | 1<br>(0 to 7)  | 0<br>(0 to 3) | 0<br>(-1 to 2) | 1<br>(0 to 3) | 0<br>(0 to 1) | 0<br>(0 to 2) | 1<br>(0 to 3) | 0<br>(0 to 1) |
|                    | <i>+industry response</i> | 5<br>(0 to 16) | 1<br>(0 to 6) | 1<br>(-1 to 5) | 2<br>(0 to 5) | 1<br>(0 to 3) | 1<br>(0 to 3) | 2<br>(0 to 5) | 1<br>(0 to 2) |
| Other              | <i>consumer behavior</i>  | 0              | 0<br>(0 to 2) | 0<br>(0 to 1)  | 0<br>(0 to 1) | 0             | 0             | 0<br>(0 to 1) | 0<br>(0 to 1) |
|                    | <i>+industry response</i> | 0              | 1<br>(0 to 4) | 0<br>(0 to 1)  | 1<br>(0 to 2) | 0<br>(0 to 1) | 0<br>(0 to 1) | 1<br>(0 to 2) | 0<br>(0 to 1) |

<sup>a</sup> Values are the median estimates (95% uncertainty intervals) of each distribution of 1000 simulations.



**eTable 16. Estimated health gains and costs associated with Nutrition Facts added sugar labeling on reducing cancer burdens in the US over 10 years (US population=235,162,844)<sup>a</sup>**

|                                                                                  | Added Sugar Labeling Policy                 |                                                                    |
|----------------------------------------------------------------------------------|---------------------------------------------|--------------------------------------------------------------------|
|                                                                                  | Consumer Behavior<br>Median (2.5% to 97.5%) | Consumer Behavior +<br>Industry Response<br>Median (2.5% to 97.5%) |
| <b>New Cancer Cases Averted, N (95% UI)</b>                                      |                                             |                                                                    |
| Endometrial cancer                                                               | 1200 (756 to 1690)                          | 2470 (1730 to 3230)                                                |
| Breast cancer<br>(postmenopausal)                                                | 1220 (743 to 1770)                          | 2510 (1690 to 3360)                                                |
| Kidney cancer                                                                    | 690 (472 to 955)                            | 1510 (1160 to 1910)                                                |
| Liver cancer                                                                     | 471 (321 to 662)                            | 1010 (761 to 1310)                                                 |
| Esophageal adenocarcinoma                                                        | 163 (82 to 270)                             | 378 (239 to 536)                                                   |
| Pancreatic cancer                                                                | 212 (137 to 297)                            | 460 (335 to 593)                                                   |
| Colorectal cancer                                                                | 231 (154 to 318)                            | 513 (386 to 659)                                                   |
| Stomach cancer (cardia)                                                          | 63 (29 to 114)                              | 153 (95 to 237)                                                    |
| Multiple myeloma                                                                 | 80 (46 to 125)                              | 190 (133 to 260)                                                   |
| Thyroid cancer                                                                   | 123 (83 to 175)                             | 268 (195 to 355)                                                   |
| Advanced prostate cancer                                                         | 52 (22 to 96)                               | 129 (76 to 194)                                                    |
| Gallbladder cancer                                                               | 41 (28 to 57)                               | 89 (67 to 113)                                                     |
| Ovarian cancer                                                                   | 52 (31 to 82)                               | 107 (66 to 155)                                                    |
| Total                                                                            | 4650 (3170 to 6250)                         | 9980 (7560 to 12300)                                               |
| <b>Cancer Deaths Prevented, N (95% UI)</b>                                       |                                             |                                                                    |
| Liver cancer                                                                     | 215 (143 to 307)                            | 468 (353 to 612)                                                   |
| Breast cancer<br>(postmenopausal)                                                | 92 (62 to 128)                              | 195 (142 to 252)                                                   |
| Endometrial cancer                                                               | 101 (63 to 142)                             | 211 (154 to 275)                                                   |
| Kidney cancer                                                                    | 75 (47 to 110)                              | 173 (129 to 230)                                                   |
| Esophageal adenocarcinoma                                                        | 66 (31 to 114)                              | 162 (102 to 231)                                                   |
| Pancreatic cancer                                                                | 111 (69 to 158)                             | 248 (176 to 327)                                                   |
| Colorectal cancer                                                                | 41 (26 to 57)                               | 93 (69 to 121)                                                     |
| Stomach cancer (cardia)                                                          | 23 (9 to 46)                                | 61 (36 to 98)                                                      |
| Multiple myeloma                                                                 | 16 (8 to 28)                                | 42 (27 to 63)                                                      |
| Gallbladder cancer                                                               | 19 (13 to 27)                               | 41 (31 to 53)                                                      |
| Advanced prostate cancer                                                         | 4 (0 to 9)                                  | 13 (7 to 21)                                                       |
| Ovarian cancer                                                                   | 15 (9 to 25)                                | 31 (19 to 47)                                                      |
| Thyroid cancer                                                                   | 1 (0 to 2)                                  | 3 (2 to 4)                                                         |
| Total                                                                            | 794 (529 to 1060)                           | 1780 (1350 to 2230)                                                |
| <b>Life Years Gained</b>                                                         | 841 (548 to 1160)                           | 1910 (1430 to 2410)                                                |
| <b>QALYs Gained</b>                                                              | 5890 (3900 to 8030)                         | 12900 (9510 to 16400)                                              |
| <b>Changes in Health-Related Costs, Cancer Only (\$, millions)<sup>b,c</sup></b> |                                             |                                                                    |
| Medical cost                                                                     | -250 (-332 to -172)                         | -542 (-664 to -421)                                                |
| Patient time cost                                                                | -10.9 (-15.4 to -7.13)                      | -24.0 (-30.5 to -17.8)                                             |
| Productivity loss                                                                | -67.5 (-91.6 to -44.8)                      | -148 (-183 to -112)                                                |
| <b>Policy Implementation Costs (\$, millions)<sup>b,c</sup></b>                  |                                             |                                                                    |
| Government cost                                                                  | 6.55 (5.68 to 7.87)                         | 6.56 (5.74 to 7.91)                                                |
| Administration                                                                   | 4.53 (4.30 to 4.79)                         | 4.53 (4.31 to 4.79)                                                |
| Monitoring                                                                       | 2.00 (1.19 to 3.34)                         | 2.01 (1.25 to 3.37)                                                |
| Industry cost                                                                    | 1660 (1390 to 1950)                         | 2040 (1740 to 2330)                                                |
| Compliance                                                                       | 1660 (1390 to 1950)                         | 1660 (1390 to 1950)                                                |
| Reformulation                                                                    | -----                                       | 367 (300 to 443)                                                   |

| <b>Net Costs, Cancer Only (\$, millions)</b> <sup>b,c,d</sup> |                           |                          |
|---------------------------------------------------------------|---------------------------|--------------------------|
| Societal perspective                                          | 1340 (1070 to 1650)       | 1330 (992 to 1660)       |
| Healthcare perspective                                        | -243 (-325 to -165)       | -535 (-657 to -414)      |
| <b>ICER (dollars/QALY)<sup>e</sup></b>                        |                           |                          |
| Societal perspective                                          | 228000 (148000 to 381000) | 105100 (66827 to 167000) |
| Healthcare perspective                                        | Cost-saving               | Cost-saving              |

Abbreviations: ICER, Incremental Cost-Effectiveness Ratio; QALY, quality-adjusted life years.

<sup>a</sup> Values are the median estimates (95% uncertainty intervals) of each distribution of 1000 simulations.

<sup>b</sup> Health-related costs were inflated to 2015 US dollars using the Personal Health Care (PHC) index. Policy intervention costs were inflated to 2015 US dollars using the Consumer Price Index. Negative costs represent savings.

<sup>c</sup> Costs are medians from 1000 simulations so may not add up to totals.

<sup>d</sup> Net costs were calculated as policy costs minus health-related costs from reduced cancer burdens. Societal perspective includes healthcare cost, patient time costs, productivity costs, and policy implementation costs; government perspective included policy costs relevant to policy implementation and program monitoring and evaluation and medical costs.

<sup>e</sup> ICER threshold was evaluated at \$150 000/QALY.

**eTable 17. Estimated health gains and costs associated with Nutrition Facts added sugar labeling on reducing cancer burdens in the US over a lifetime, 1-way sensitivity analyses at 50% of the policy impact and the diet-BMI association (US population=235,162,844)<sup>a</sup>**

|                                             | Added Sugar Labeling Policy                 |                                                                         |                                             |                                                                         |
|---------------------------------------------|---------------------------------------------|-------------------------------------------------------------------------|---------------------------------------------|-------------------------------------------------------------------------|
|                                             | 50% Policy Impact                           |                                                                         | 50% diet-BMI Association                    |                                                                         |
|                                             | Consumer Behavior<br>Median (2.5% to 97.5%) | Consumer Behavior +<br>Industry Reformulation<br>Median (2.5% to 97.5%) | Consumer Behavior<br>Median (2.5% to 97.5%) | Consumer Behavior +<br>Industry Reformulation<br>Median (2.5% to 97.5%) |
| <b>New Cancer Cases Averted, N (95% UI)</b> |                                             |                                                                         |                                             |                                                                         |
| Endometrial cancer                          | 2270 (71 to 4960)                           | 6960 (4440 to 10300)                                                    | 3120 (1750 to 4750)                         | 7690 (5470 to 10200)                                                    |
| Breast cancer (postmenopausal)              | 2230 (266 to 4620)                          | 6460 (4040 to 9670)                                                     | 2880 (1680 to 4440)                         | 6950 (4990 to 9520)                                                     |
| Kidney cancer                               | 3140 (2130 to 4260)                         | 5930 (4620 to 7300)                                                     | 2740 (2080 to 3470)                         | 5450 (4350 to 6620)                                                     |
| Liver cancer                                | 2970 (2090 to 4220)                         | 5500 (4290 to 7180)                                                     | 2540 (1960 to 3360)                         | 4980 (3960 to 6320)                                                     |
| Esophageal adenocarcinoma                   | 976 (628 to 1400)                           | 1710 (1280 to 2250)                                                     | 792 (572 to 1070)                           | 1510 (1120 to 1960)                                                     |
| Pancreatic cancer                           | 750 (442 to 1100)                           | 1600 (1190 to 2080)                                                     | 729 (518 to 961)                            | 1550 (1210 to 1920)                                                     |
| Colorectal cancer                           | 692 (471 to 926)                            | 1300 (994 to 1640)                                                      | 599 (449 to 760)                            | 1190 (937 to 1470)                                                      |
| Stomach cancer (cardia)                     | 405 (252 to 633)                            | 734 (532 to 1050)                                                       | 339 (237 to 506)                            | 664 (471 to 938)                                                        |
| Multiple myeloma                            | 328 (181 to 518)                            | 715 (494 to 999)                                                        | 325 (218 to 466)                            | 698 (500 to 934)                                                        |
| Thyroid cancer                              | 297 (143 to 502)                            | 670 (449 to 990)                                                        | 305 (199 to 462)                            | 669 (472 to 946)                                                        |
| Advanced prostate cancer                    | 241 (161 to 351)                            | 408 (296 to 560)                                                        | 190 (135 to 262)                            | 351 (254 to 478)                                                        |
| Gallbladder cancer                          | 158 (93 to 231)                             | 344 (266 to 443)                                                        | 156 (117 to 203)                            | 337 (272 to 418)                                                        |
| Ovarian cancer                              | 57 (-3 to 148)                              | 180 (74 to 318)                                                         | 79 (32 to 145)                              | 199 (99 to 318)                                                         |
| Total                                       | 14800 (3170 to 6250)                        | 32800 (24700 to 42500)                                                  | 15000 (10800 to 19700)                      | 32500 (25700 to 39900)                                                  |
| <b>Cancer Deaths Prevented, N (95% UI)</b>  |                                             |                                                                         |                                             |                                                                         |
| Liver cancer                                | 2610 (1820 to 3710)                         | 4810 (3720 to 6290)                                                     | 2220 (1710 to 2950)                         | 4350 (3440 to 5540)                                                     |
| Breast cancer (postmenopausal)              | 1160 (-77 to 2920)                          | 3580 (1920 to 6070)                                                     | 1590 (776 to 2790)                          | 3960 (2470 to 5910)                                                     |
| Endometrial cancer                          | 753 (51 to 1730)                            | 2360 (1510 to 3580)                                                     | 1050 (617 to 1640)                          | 2620 (1880 to 3500)                                                     |
| Kidney cancer                               | 1190 (788 to 1660)                          | 2260 (1750 to 2850)                                                     | 1040 (784 to 1340)                          | 2090 (1680 to 2540)                                                     |
| Esophageal adenocarcinoma                   | 846 (545 to 1210)                           | 1470 (1090 to 1940)                                                     | 680 (494 to 922)                            | 1290 (957 to 1670)                                                      |
| Pancreatic cancer                           | 655 (390 to 961)                            | 1400 (1040 to 1800)                                                     | 636 (451 to 834)                            | 1350 (1060 to 1680)                                                     |
| Colorectal cancer                           | 452 (306 to 607)                            | 850 (659 to 1080)                                                       | 393 (296 to 501)                            | 779 (612 to 968)                                                        |
| Stomach cancer (cardia)                     | 334 (206 to 525)                            | 603 (435 to 860)                                                        | 279 (196 to 417)                            | 543 (384 to 769)                                                        |
| Multiple myeloma                            | 197 (114 to 316)                            | 429 (303 to 591)                                                        | 194 (133 to 278)                            | 418 (309 to 552)                                                        |
| Gallbladder cancer                          | 130 (76 to 193)                             | 290 (219 to 376)                                                        | 132 (97 to 172)                             | 286 (230 to 354)                                                        |
| Advanced prostate cancer                    | 108 (71 to 167)                             | 183 (129 to 259)                                                        | 85 (60 to 123)                              | 157 (112 to 219)                                                        |
| Ovarian cancer                              | 42 (-1 to 102)                              | 130 (62 to 220)                                                         | 57 (25 to 102)                              | 142 (77 to 215)                                                         |
| Thyroid cancer                              | 13 (6 to 20)                                | 27 (18 to 39)                                                           | 12 (8 to 18)                                | 26 (18 to 36)                                                           |
| Total                                       | 8730 (5080 to 12800)                        | 18600 (14000 to 24100)                                                  | 8540 (6190 to 11400)                        | 18200 (14300 to 22500)                                                  |

|                                                                                  |                        |                          |                        |                          |
|----------------------------------------------------------------------------------|------------------------|--------------------------|------------------------|--------------------------|
| <b>Life Years Gained</b>                                                         | 39400 (22300 to 58500) | 85600 (63600 to 111000)  | 39200 (28200 to 52800) | 84100 (66000 to 105000)  |
| <b>QALYs Gained</b>                                                              | 57800 (32100 to 86900) | 128000 (95100 to 166000) | 58100 (41902 to 76600) | 126000 (99500 to 156000) |
| <b>Changes in Health-Related Costs, Cancer Only (\$, millions)<sup>b,c</sup></b> |                        |                          |                        |                          |
| Medical cost                                                                     | -830 (-506 to -1180)   | -1760 (-2200 to -1340)   | -800 (-1020 to -596)   | -1700 (-2040 to -1360)   |
| Patient time cost                                                                | -54.0 (-86.0 to -26.9) | -126 (-164 to -93.0)     | -57.0 (-75.7 to -40.3) | -126 (-155 to -100)      |
| Productivity loss                                                                | -320 (-501 to -164)    | -740 (-970 to -548)      | -335 (-445 to -239)    | -740 (-909 to -585)      |
| <b>Policy Implementation Costs (\$, millions)<sup>b,c</sup></b>                  |                        |                          |                        |                          |
| Government cost                                                                  | 9.24 (7.18 to 12.8)    | 9.30 (7.28 to 12.5)      | 9.24 (7.18 to 12.8)    | 9.30 (7.28 to 12.5)      |
| Administration                                                                   | 4.53 (4.29 to 4.80)    | 4.53 (4.29 to 4.77)      | 4.53 (4.29 to 4.80)    | 4.53 (4.29 to 4.77)      |
| Monitoring                                                                       | 4.69 (2.75 to 8.29)    | 4.77 (2.69 to 7.96)      | 4.69 (2.75 to 8.29)    | 4.77 (2.69 to 7.96)      |
| Industry cost                                                                    | 1660 (1410 to 1960)    | 2540 (2240 to 2880)      | 1660 (1410 to 1960)    | 2540 (2240 to 2880)      |
| Compliance                                                                       | 1660 (1410 to 1960)    | 1660 (1400 to 1970)      | 1660 (1410 to 1960)    | 1660 (1400 to 1970)      |
| Reformulation                                                                    | -----                  | 869 (718 to 1061)        | -----                  | 869 (718 to 1061)        |
| <b>Net Costs, Cancer Only (\$, millions)<sup>b,c,d</sup></b>                     |                        |                          |                        |                          |
| Societal perspective                                                             | 482 (122 to 1020)      | -63.2 (-851 to 642)      | 479 (49.0 to 884)      | -16.0 (-662 to 604)      |
| Healthcare perspective                                                           | -820 (-1170 to -496)   | -1750 (-2190 to -1330)   | -790 (-1000 to -586)   | -1690 (-2030 to -1350)   |
| <b>ICER (dollars/QALY)<sup>e</sup></b>                                           |                        |                          |                        |                          |
| Societal perspective                                                             | 8330 (-1670 to 30200)  | Cost-saving              | 8320 (709 to 19750)    | Cost-saving              |
| Healthcare perspective                                                           | Cost-saving            | Cost-saving              | Cost-saving            | Cost-saving              |

Abbreviations: ICER, Incremental Cost-Effectiveness Ratio; QALY, quality-adjusted life years.

<sup>a</sup> Values are the median estimates (95% uncertainty intervals) of each distribution of 1000 simulations.

<sup>b</sup> Health-related costs were inflated to 2015 US dollars using the Personal Health Care (PHC) index. Policy intervention costs were inflated to 2015 US dollars using the Consumer Price Index. Negative costs represent savings.

<sup>c</sup> Costs are medians from 1000 simulations so may not add up to totals.

<sup>d</sup> Net costs were calculated as policy costs minus health-related costs from reduced cancer burdens. Societal perspective includes healthcare cost, patient time costs, productivity costs, and policy implementation costs; government perspective included policy costs relevant to policy implementation and program monitoring and evaluation and medical costs.

<sup>e</sup> ICER threshold was evaluated at \$150 000/QALY.

**eTable 18. Estimated health gains and costs associated with Nutrition Facts added sugar labeling on reducing cancer burdens in the US over a lifetime, threshold analyses on policy impact (US population=235,162,844)<sup>a</sup>**

|                                                                                  | Added Sugar Labeling Policy                         |                                                     |                                                                                      |
|----------------------------------------------------------------------------------|-----------------------------------------------------|-----------------------------------------------------|--------------------------------------------------------------------------------------|
|                                                                                  | Consumer Behavior (1.65%)<br>Median (2.5% to 97.5%) | Consumer Behavior (4.55%)<br>Median (2.5% to 97.5%) | Consumer Behavior (3.23%) + Industry Reformulation (4.04%)<br>Median (2.5% to 97.5%) |
| <b>New Cancer Cases Averted, N (95% UI)</b>                                      | 7650 (1230 to 13500)                                | 20900 (14400 to 27700)                              | 32600 (26000 to 39900)                                                               |
| <b>Cancer Deaths Prevented, N (95% UI)</b>                                       | 4760 (1440 to 7950)                                 | 12100 (8510 to 15700)                               | 18500 (14900 to 22500)                                                               |
| <b>Life Years Gained</b>                                                         | 20900 (5240 to 35700)                               | 55000 (38100 to 72200)                              | 85000 (67600 to 104000)                                                              |
| <b>QALYs Gained</b>                                                              | 29900 (5170 to 52900)                               | 81500 (54200 to 109000)                             | 126000 (101000 to 156000)                                                            |
| <b>Changes in Health-Related Costs, Cancer Only (\$, millions)<sup>b,c</sup></b> |                                                     |                                                     |                                                                                      |
| Medical cost                                                                     | -458 (-749 to -158)                                 | -1140 (-1440 to -809)                               | -1740 (-2100 to -1410)                                                               |
| Patient time cost                                                                | -25.0 (-51.5 to 2.28)                               | -77.7 (-106 to -50.6)                               | -124 (-155 to -97)                                                                   |
| Productivity loss                                                                | -149 (-303 to 5.86)                                 | -458 (-620 to -301)                                 | -729 (-902 to -574)                                                                  |
| <b>Policy Implementation Costs (\$, millions)<sup>b,c</sup></b>                  |                                                     |                                                     |                                                                                      |
| Government cost                                                                  | 9.24 (7.18 to 12.8)                                 | 9.24 (7.18 to 12.8)                                 | 9.30 (7.28 to 12.5)                                                                  |
| Administration                                                                   | 4.53 (4.29 to 4.80)                                 | 4.53 (4.29 to 4.80)                                 | 4.53 (4.29 to 4.77)                                                                  |
| Monitoring                                                                       | 4.69 (2.75 to 8.29)                                 | 4.69 (2.75 to 8.29)                                 | 4.77 (2.69 to 7.96)                                                                  |
| Industry cost                                                                    | 1660 (1410 to 1960)                                 | 1660 (1410 to 1960)                                 | 2540 (2240 to 2880)                                                                  |
| Compliance                                                                       | 1660 (1410 to 1960)                                 | 1660 (1410 to 1960)                                 | 1660 (1400 to 1970)                                                                  |
| Reformulation                                                                    | -----                                               | -----                                               | 869 (718 to 1060)                                                                    |
| <b>Net Costs, Cancer Only (\$, millions)<sup>b,c,d</sup></b>                     |                                                     |                                                     |                                                                                      |
| Societal perspective                                                             | 1050 (510 to 1540)                                  | 10.9 (-566 to 526)                                  | -42.0 (-687 to 591)                                                                  |
| Healthcare perspective                                                           | -448 (-741 to -148)                                 | -1130 (-1430 to -801)                               | -1730 (-2090 to -1400)                                                               |
| <b>ICER (dollars/QALY)<sup>e</sup></b>                                           |                                                     |                                                     |                                                                                      |
| Societal perspective                                                             | 34900 (9190 to 233000)                              | 135 (-5490 to 8870)                                 | Cost-saving                                                                          |
| Healthcare perspective                                                           | Cost-saving                                         | Cost-saving                                         | Cost-saving                                                                          |

Abbreviations: ICER, Incremental Cost-Effectiveness Ratio; QALY, quality-adjusted life years.

<sup>a</sup> Values are the median estimates (95% uncertainty intervals) of each distribution of 1000 simulations.

<sup>b</sup> Health-related costs were inflated to 2015 US dollars using the Personal Health Care (PHC) index. Policy intervention costs were inflated to 2015 US dollars using the Consumer Price Index. Negative costs represent savings.

<sup>c</sup> Costs are medians from 1000 simulations so may not add up to totals.

<sup>d</sup> Net costs were calculated as policy costs minus health-related costs from reduced cancer burdens. Societal perspective includes healthcare cost, patient time costs, productivity costs, and policy implementation costs; government perspective included policy costs relevant to policy implementation and program monitoring and evaluation and medical costs.

° ICER threshold was evaluated at \$150 000/QALY.

**eFigure 1. Diet and Cancer Outcome Model (DiCOM)**

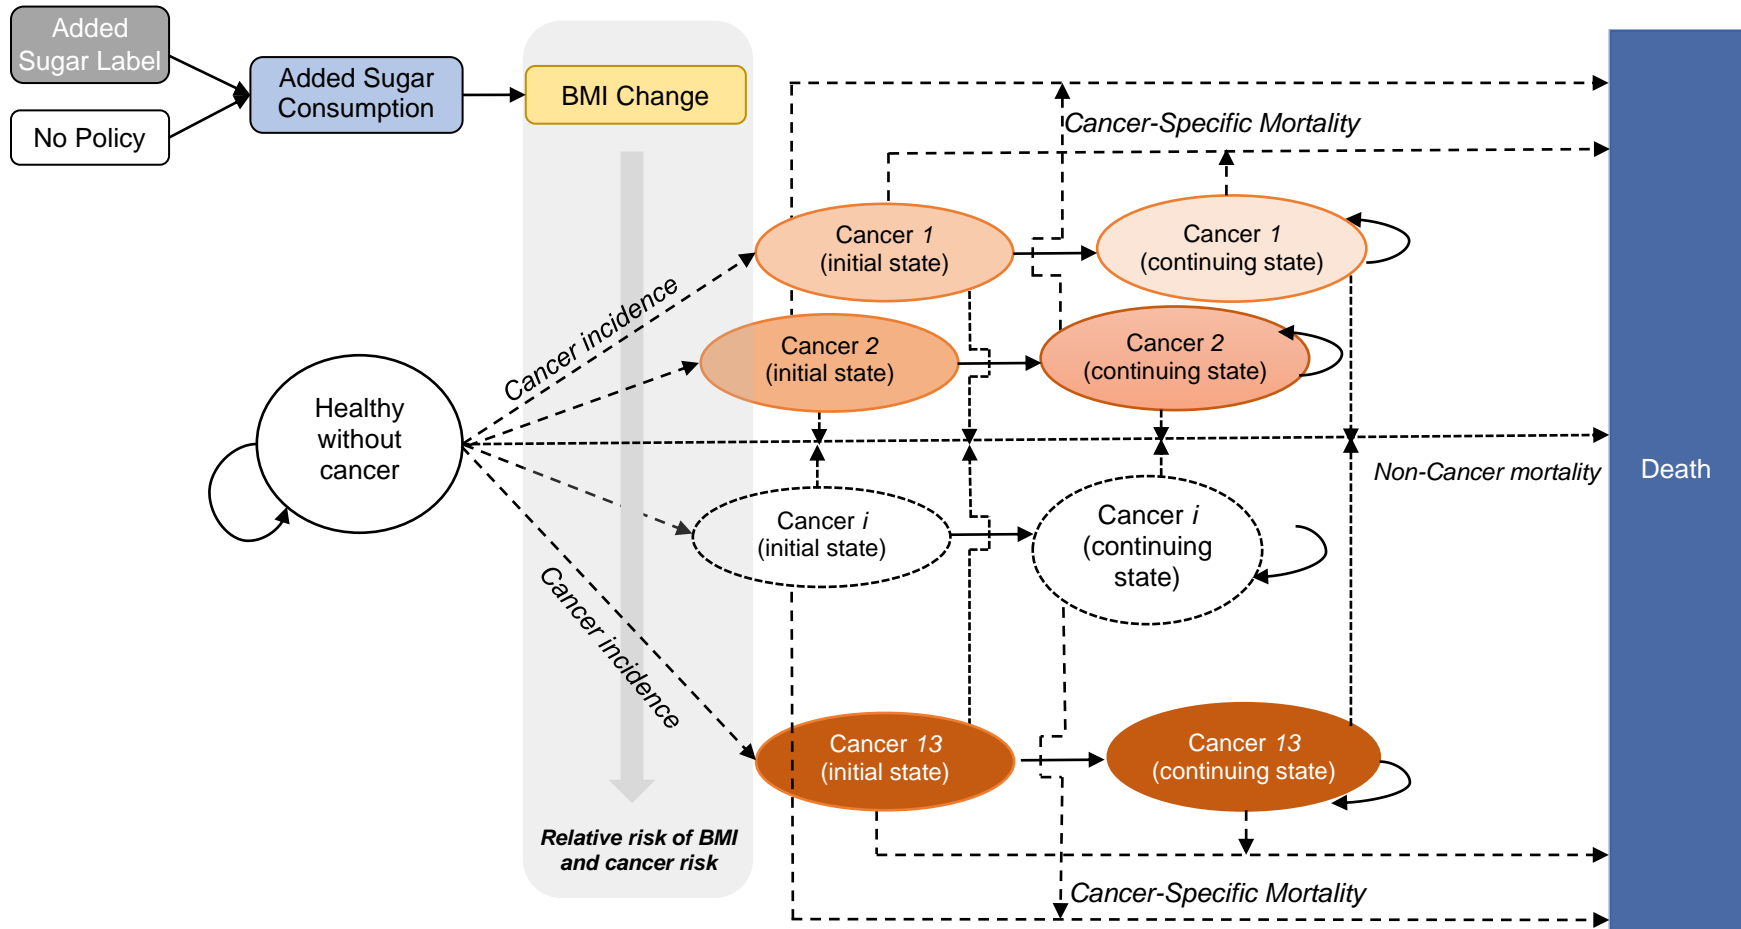

The model consists of four general health states: (a) healthy without cancer (healthy state); (b) initial cancer diagnosis (initial state) for each cancer type  $i$ ; (c) continuing care (continuing state) for each cancer type  $i$ ; and (d) death state. Transitions between states are based on national cancer incidence and cancer-specific mortality rates from SEER (for individual with cancer) and lifetable-based mortality rates (for individuals without cancer). The model simulates the policy impact on the number of new cases and deaths of 13 obesity-associated cancers, health-related quality of life (HRQOL), and health-related costs among U.S. adults over a lifetime by comparing a policy scenario (added sugar label) to a non-policy scenario (status quo).

**eFigure 2. Estimated reduced new cancer cases and deaths associated with Nutrition Facts added sugar labeling policy in the US by age, gender, race/ethnicity, and cancer type over a lifetime**

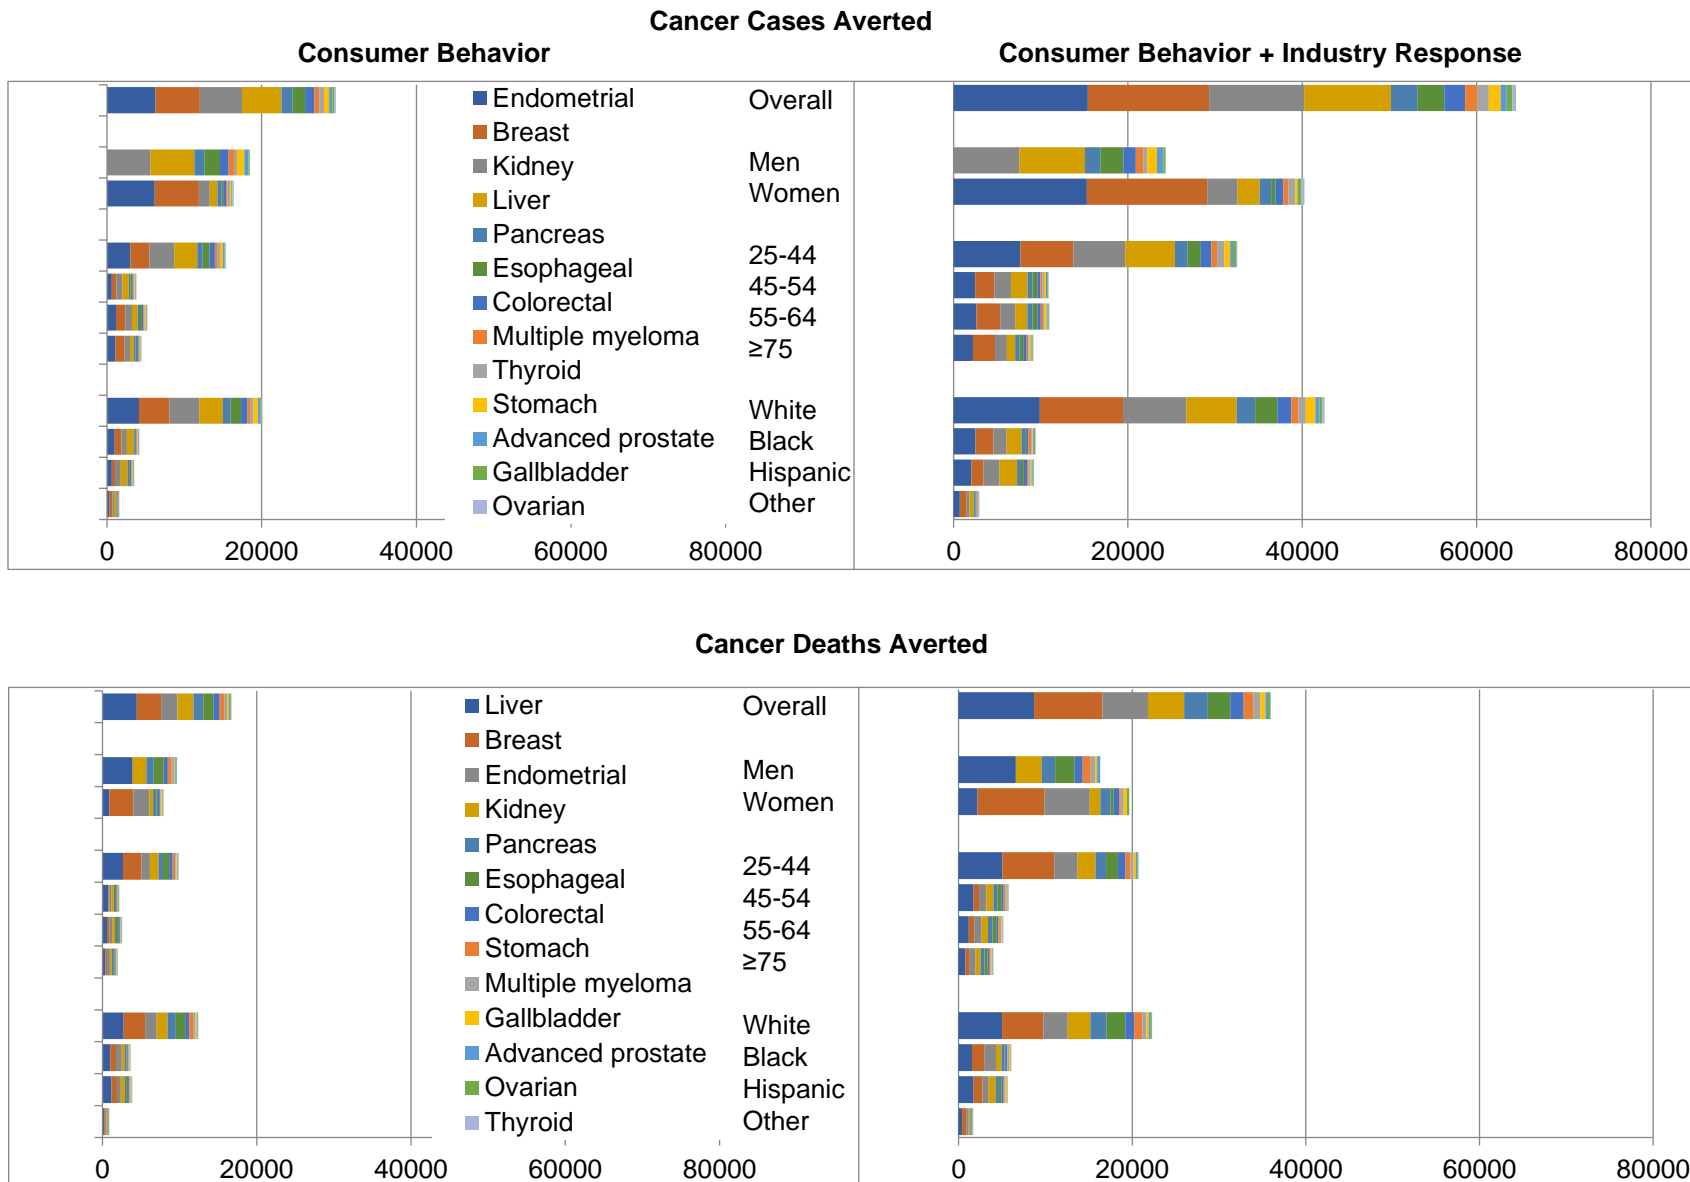



**eFigure 3. Estimated life years and QALYs gained associated with Nutrition Facts added sugar labeling policy in the US by age, gender, and race/ethnicity over a lifetime**

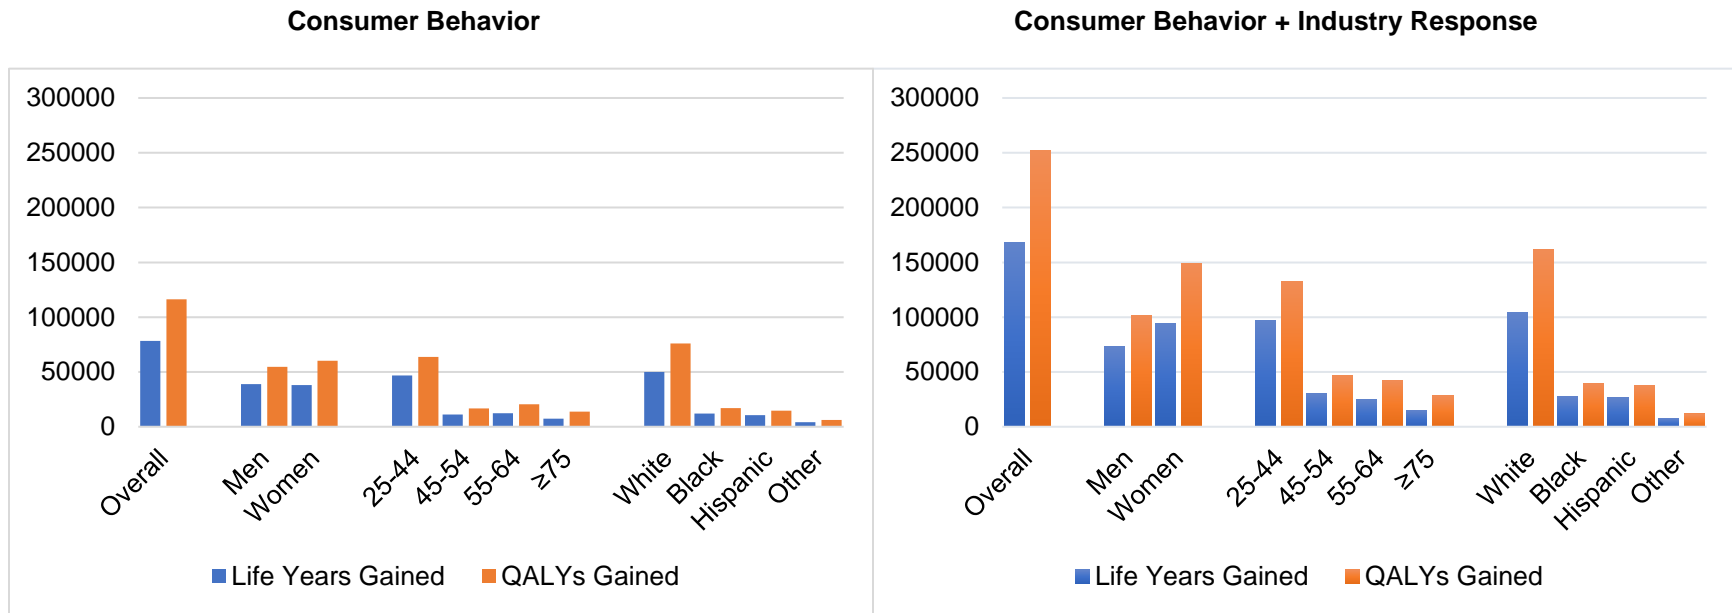

**eFigure 4. Estimated changes of health-related costs associated with Nutrition Facts added sugar labeling policy in the US by age, gender, race/ethnicity and cancer type over a lifetime**

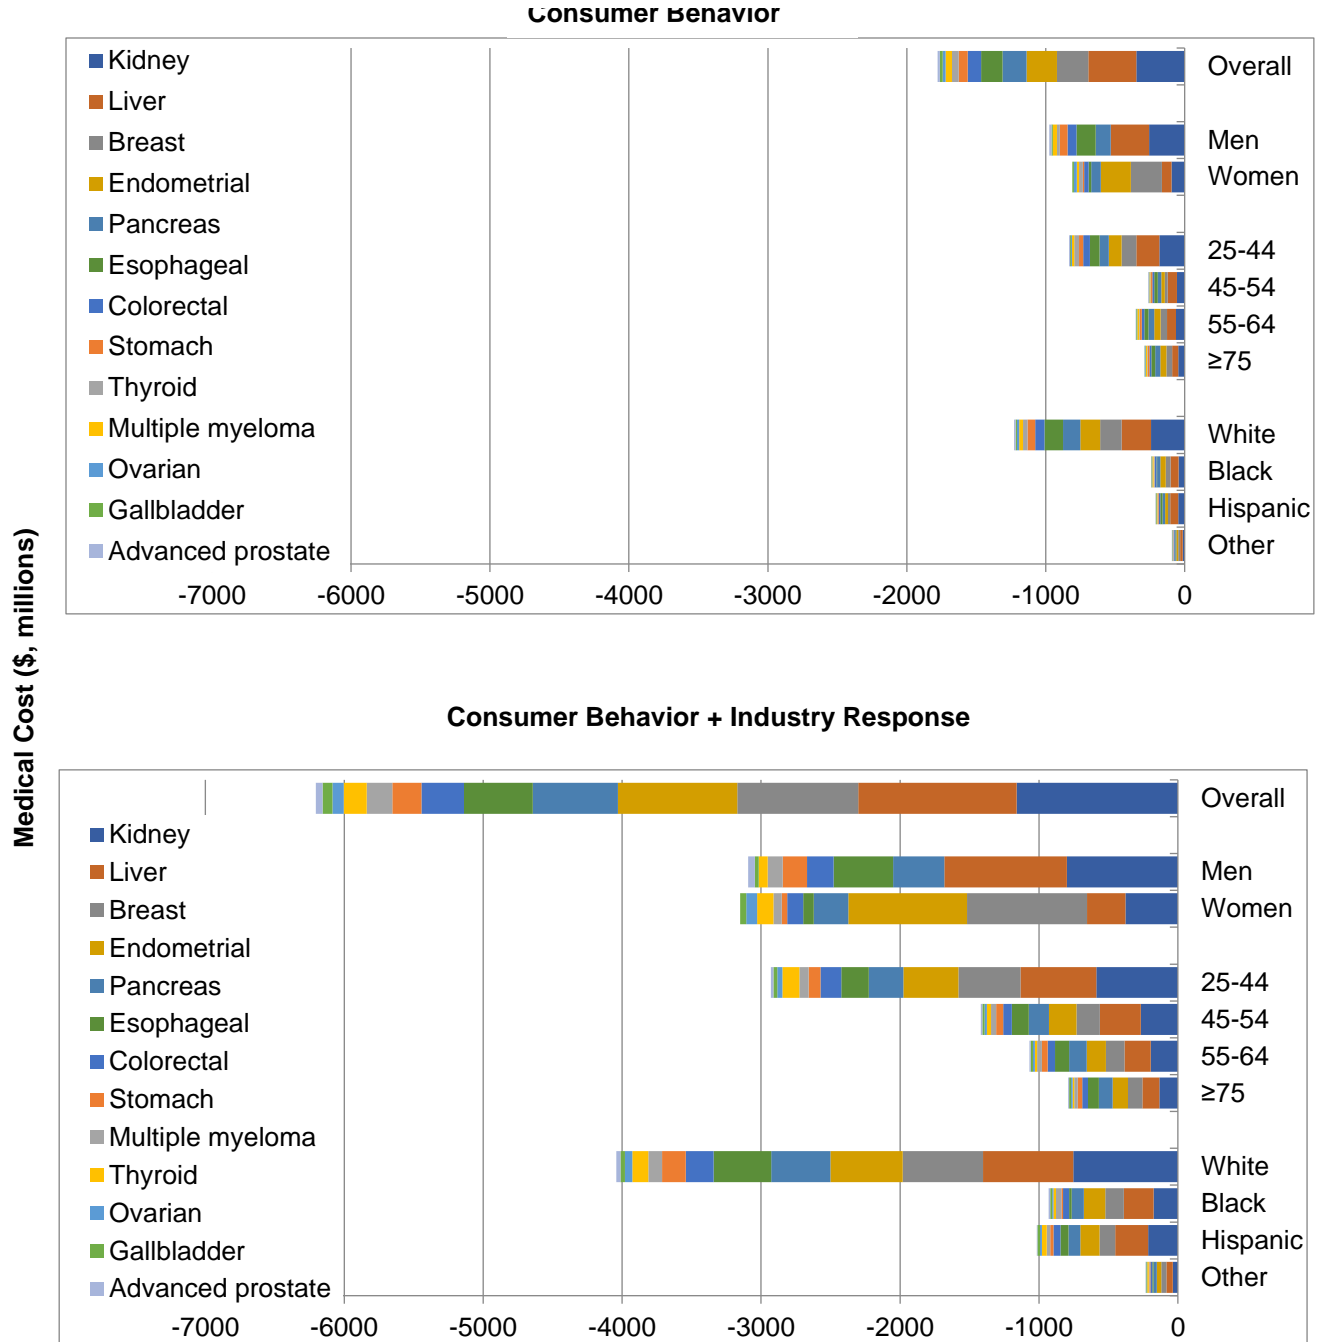

(A)

### Consumer Behavior

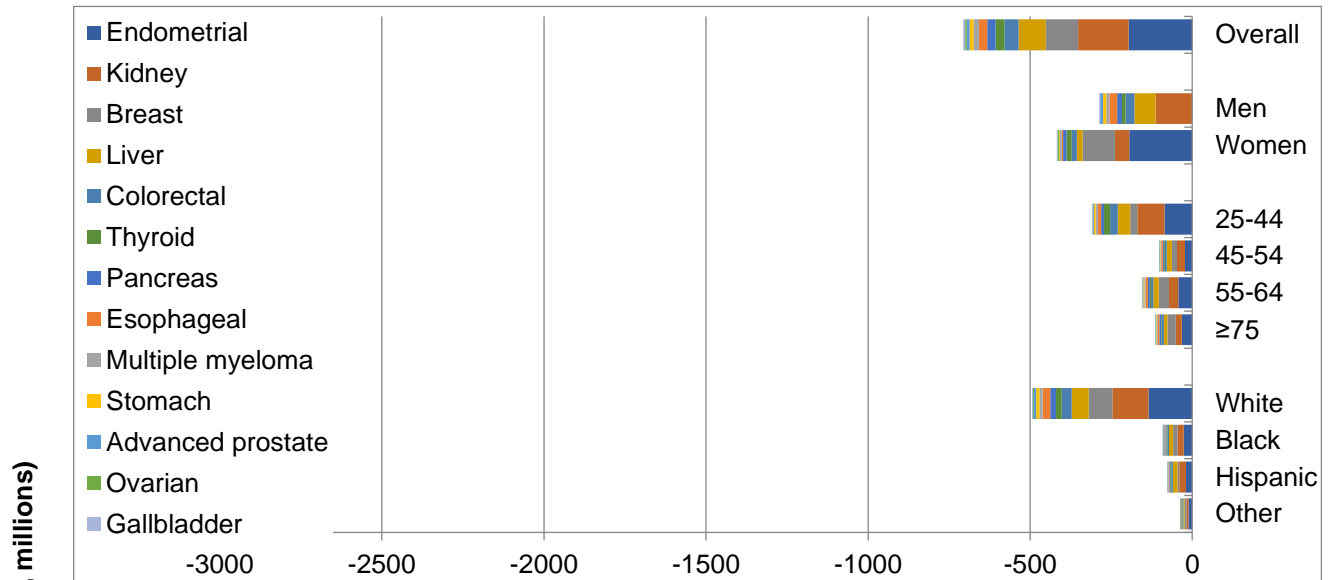

### Consumer Behavior + Industry Response

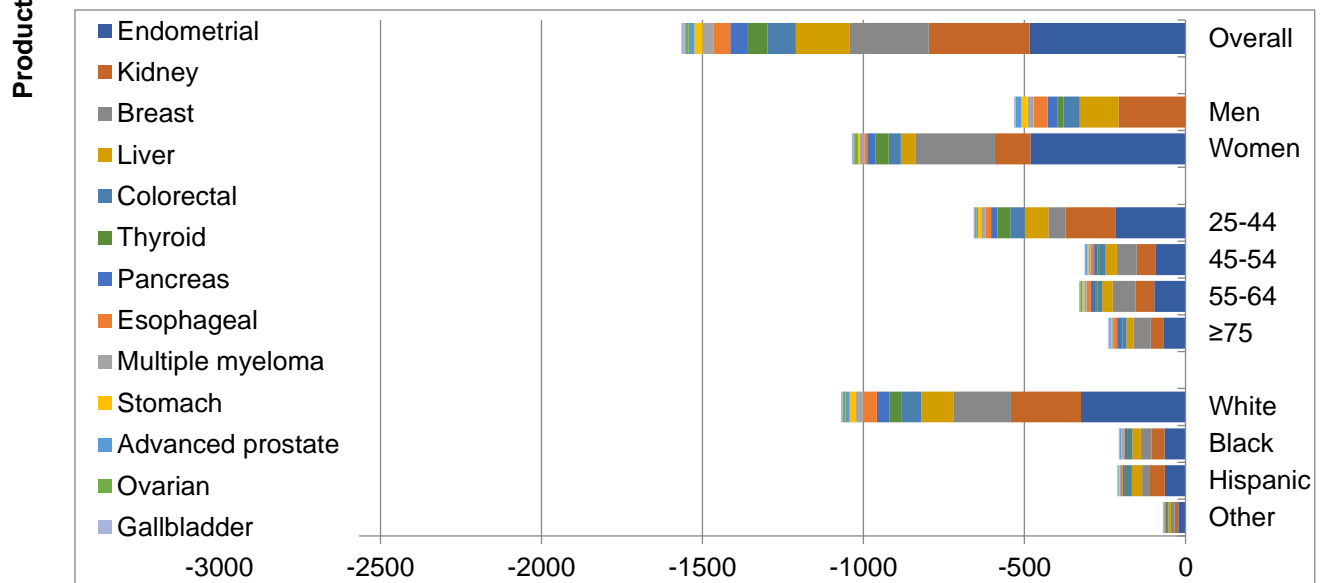

(B)

### Consumer Behavior

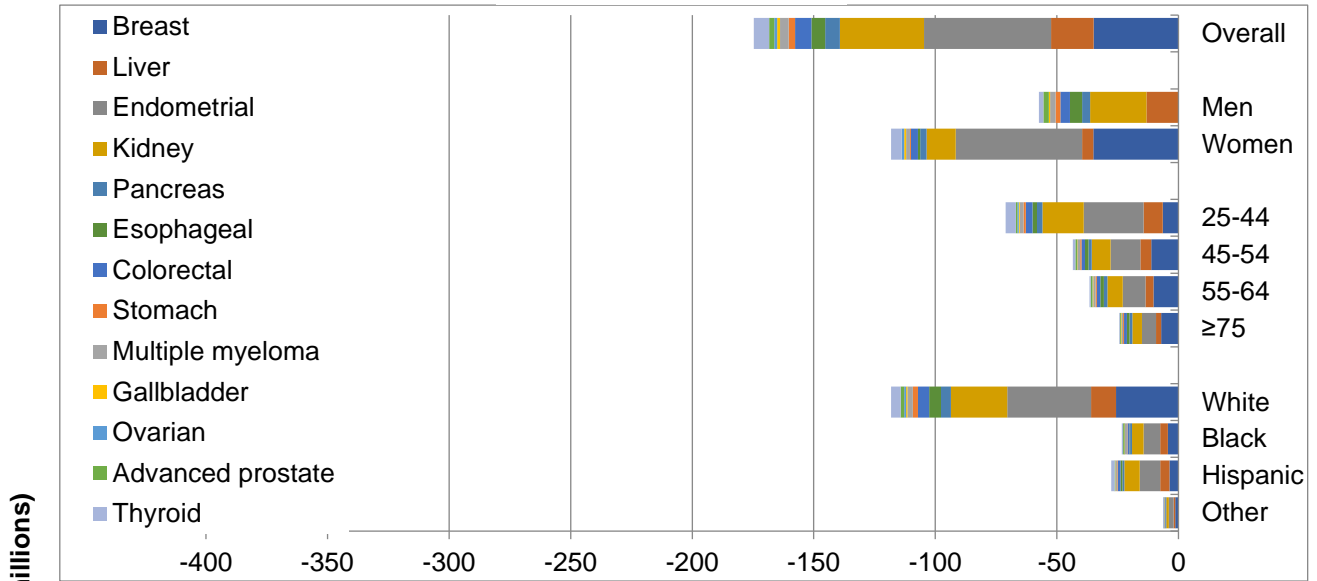

### Consumer Behavior + Industry Response

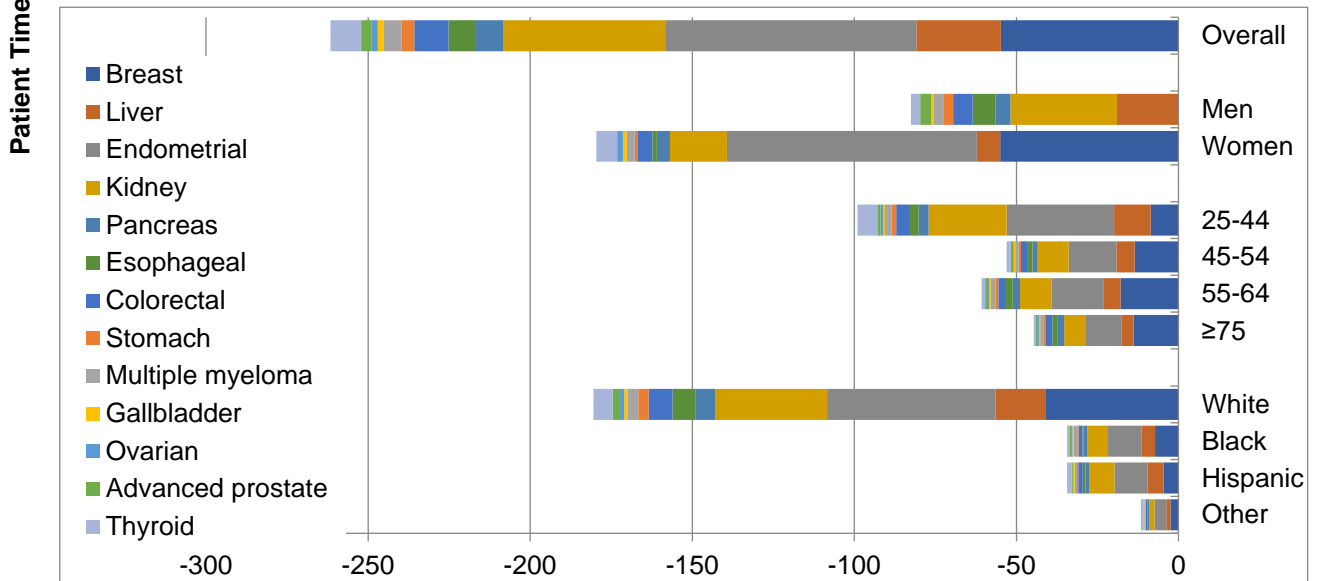

(C)

**eFigure 5. Estimated net costs from societal and healthcare perspectives associated with Nutrition Facts added sugar labeling policy in the US by age, gender, and race/ethnicity over a lifetime**

Net Costs (\$ millions)

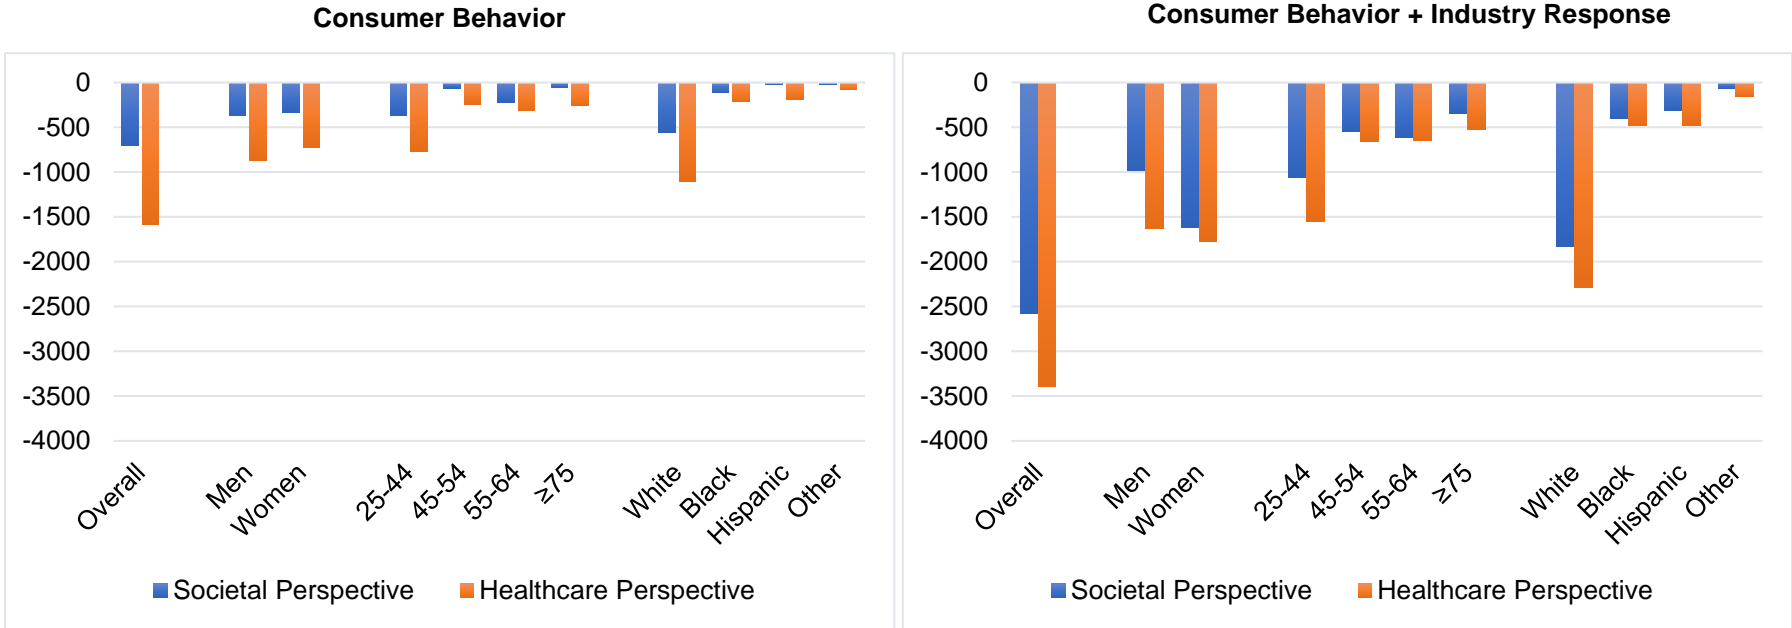

**eFigure 6. One-way sensitivity analysis of net costs of Nutrition Facts added sugar label and obesity-associated cancer rates to varying assumptions of key input parameters from (A) societal perspective and (B) healthcare perspective**

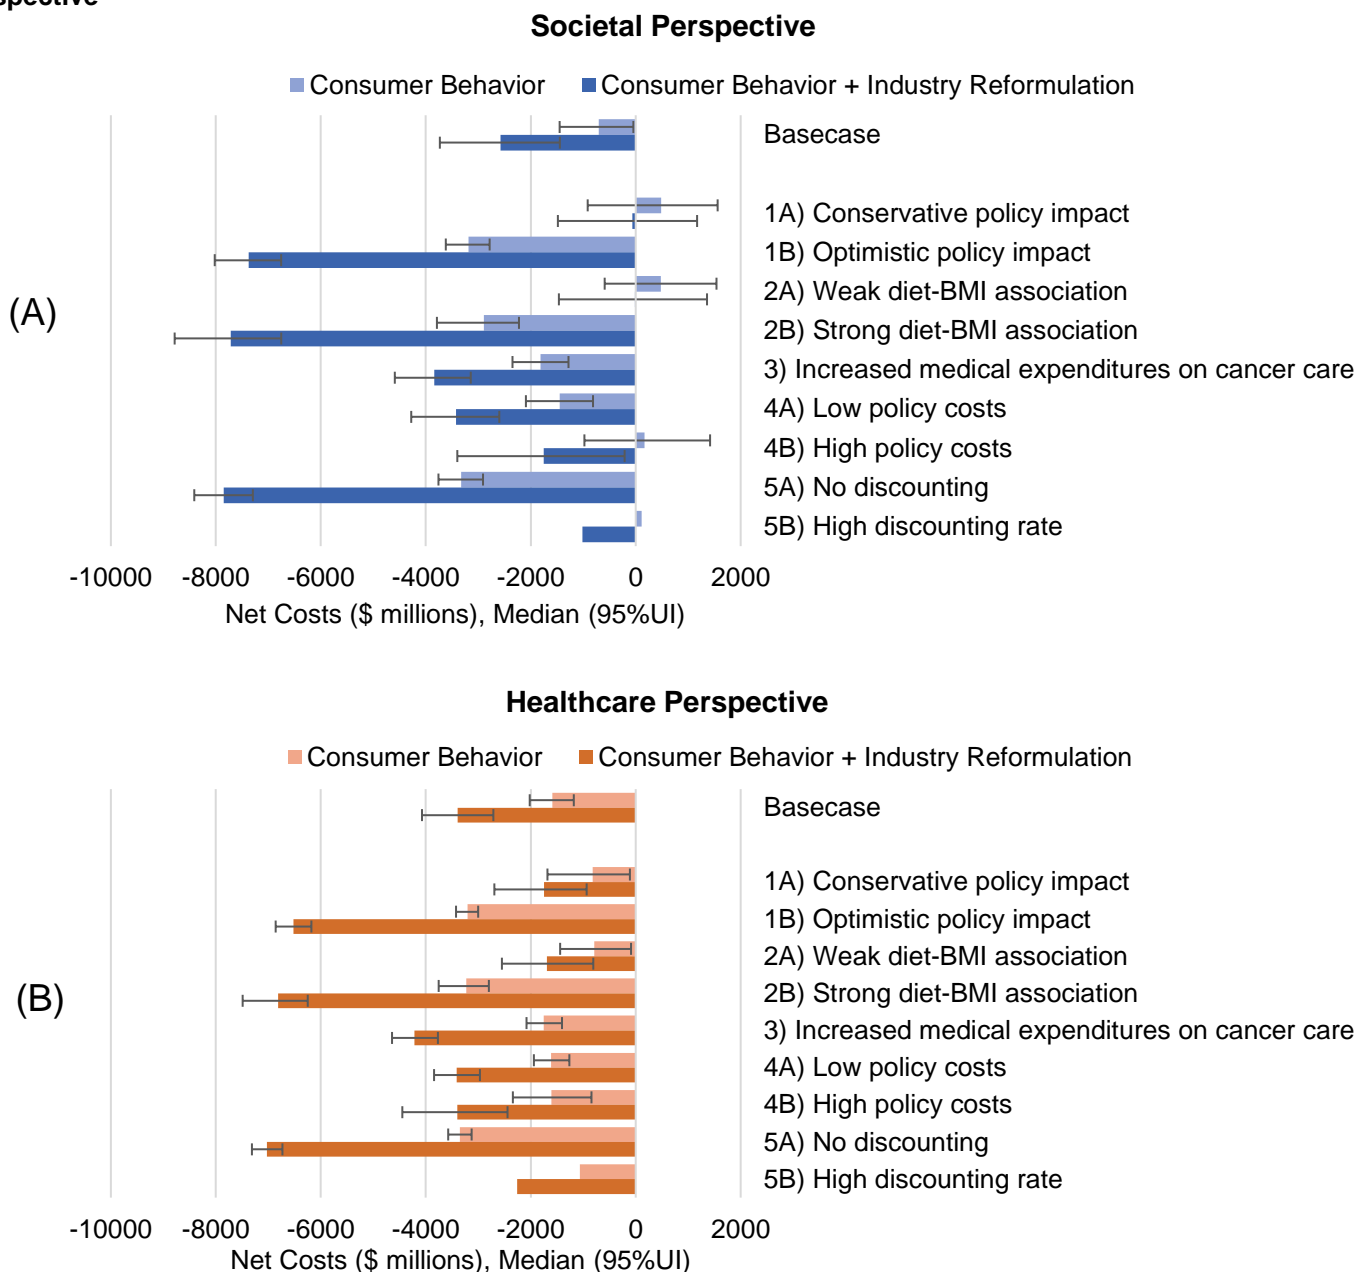

1a) conservative policy impact assumed half of the base-case policy impact (consumer behavior: -3.3%; industry reformulation: -4.13%); 1b) optimistic policy impact assumed two times of the base-case policy effect (consumer behavior: -13.0%; industry reformulation: -16.5%); 2a) weaker diet-BMI association assumed half of the base-case diet-BMI association (healthy-weight: 0.05 kg/m<sup>2</sup>; overweight/obese: 0.12 kg/m<sup>2</sup>); 2b) stronger diet-BMI association assumed two times of the base-case diet-BMI association (healthy-weight: 0.20 kg/m<sup>2</sup>; overweight/obese: 0.46 kg/m<sup>2</sup>); 3) 2% annual increase in medical expenditure on cancer care; 4a) lower policy implementation costs assumed 25% of the total costs for implementing the Nutrition Facts label; 4b) higher policy implementation costs assumed 75% of the total costs for implementing the Nutrition Facts label; 5a) lower discounting rate assumed 0% discounting rate; and 5b) higher discounting rate assumed 5% discounting rate. Under base-case scenario (policy effect assumed consumer behavior: -6.6%, and industry reformulation: -8.25%; diet-BMI association assumed healthy-weight: 0.1 kg/m<sup>2</sup>, and overweight/obese: 0.23 kg/m<sup>2</sup>; medical expenditure on cancer care assumed 0% annual increase; policy implementation costs assumed 50% of the total costs for implementing the Nutrition Facts label; discounting rate assumed 3%), the policy was cost-saving from both societal and healthcare perspectives. The policy remained cost-saving for all sensitivity analyses from the healthcare perspective and from societal perspective with additional industry reformulation. With consumer behavior alone, the policy was cost-saving when under 1b, 2b, 3, 4a, and 5b and was cost-effective under 1a (ICER: \$8330/QALY), 2a (\$8320/QALY), 4b (\$933/QALY), and 5b (\$1680/QALY).

## eReferences

1. Centers for Disease Control and Prevention. NPCR and SEER Incidence – U.S. Cancer Statistics Public Use Databases. United States Department of Health and Human Services, Centers for Disease Control and Prevention and National Cancer Institute. [www.cdc.gov/cancer/uscs/public-use](http://www.cdc.gov/cancer/uscs/public-use). Accessed 2018.
2. Mariotto AB, Yabroff KR, Shao Y, Feuer EJ, Brown ML. Projections of the cost of cancer care in the United States: 2010-2020. *Journal of the National Cancer Institute*. 2011;103(2):117-128.
3. Clegg LX, Hankey BF, Tiwari R, Feuer EJ, Edwards BK. Estimating average annual per cent change in trend analysis. *Statistics in medicine*. 2009;28(29):3670-3682.
4. United States Census Bureau. Projections for the United States: 2017 to 2060. <https://www.census.gov/data/tables/2017/demo/popproj/2017-summary-tables.html>. Published 2018. Accessed.
5. National Cancer Institute. Surveillance research Program. Measures of Cancer Survival. <https://surveillance.cancer.gov/survival/measures.html>. Accessed.
6. Brenner H, Hakulinen T. Up-to-date and precise estimates of cancer patient survival: model-based period analysis. *American journal of epidemiology*. 2006;164(7):689-696.
7. Brenner H, Hakulinen T. Up-to-date cancer survival: period analysis and beyond. *International journal of cancer*. 2009;124(6):1384-1390.
8. National Cancer Institute. Surveillance Research Program. Cancer Survival Statistics: Cohort Definition Using Diagnosis Year. <https://surveillance.cancer.gov/survival/cohort.html>. Accessed.
9. Shanguan S, Afshin A, Shulkin M, et al. A Meta-Analysis of Food Labeling Effects on Consumer Diet Behaviors and Industry Practices. *American journal of preventive medicine*. 2019;56(2):300-314.
10. Huang Y, Kyridemos C, Liu J, et al. Cost-Effectiveness of the US Food and Drug Administration Added Sugar Labeling Policy for Improving Diet and Health. *Circulation*. 2019;139(23):2613-2624.
11. Food and Drug Administration. Regulatory impact analysis for final rules on "Food labeling: revision of the nutrition and supplement facts label". In: Food and Drug Administration, ed 2017.
12. Public Health England. *Sugar Reduction, achieving the 20%: A technical report outlining progress to date, guidelines for industry, 2015 baseline levels in key foods and next steps*. 2017.
13. Food and Drug Administration. *Justification of Estimates for Appropriations Committees Fiscal Year 2012*. 2012.
14. Food and Drug Administration. *The Nutrition Review Project. Report to the Director, Center for Food Safety and Applied Nutrition*. 2014.
15. Sanders GD, Neumann PJ, Basu A, et al. Recommendations for Conduct, Methodological Practices, and Reporting of Cost-effectiveness Analyses: Second Panel on Cost-Effectiveness in Health and Medicine. *Jama*. 2016;316(10):1093-1103.
16. Guy GP, Jr., Ekwueme DU, Yabroff KR, et al. Economic burden of cancer survivorship among adults in the United States. *Journal of clinical oncology : official journal of the American Society of Clinical Oncology*. 2013;31(30):3749-3757.
17. Hogan C, Lunney J, Gabel J, Lynn J. Medicare beneficiaries' costs of care in the last year of life. *Health affairs (Project Hope)*. 2001;20(4):188-195.
18. Yabroff KR, Davis WW, Lamont EB, et al. Patient time costs associated with cancer care. *Journal of the National Cancer Institute*. 2007;99(1):14-23.
19. Yabroff KR, Guy GP, Jr., Ekwueme DU, et al. Annual patient time costs associated with medical care among cancer survivors in the United States. *Medical care*. 2014;52(7):594-601.
20. Zheng Z, Yabroff KR, Guy GP, Jr., et al. Annual Medical Expenditure and Productivity Loss Among Colorectal, Female Breast, and Prostate Cancer Survivors in the United States. *Journal of the National Cancer Institute*. 2016;108(5).
21. Martin AB, Hartman M, Washington B, Catlin A. National Health Care Spending In 2017: Growth Slows To Post-Great Recession Rates; Share Of GDP Stabilizes. *Health affairs (Project Hope)*. 2019;38(1):101377hlthaff201805085.
22. Lauby-Secretan B, Scoccianti C, Loomis D, Grosse Y, Bianchini F, Straif K. Body Fatness and Cancer--Viewpoint of the IARC Working Group. *The New England journal of medicine*. 2016;375(8):794-798.

23. Naik H, Howell D, Su S, et al. EQ-5D Health Utility Scores: Data from a Comprehensive Canadian Cancer Centre. *The patient*. 2017;10(1):105-115.
24. Wildi SM, Cox MH, Clark LL, et al. Assessment of health state utilities and quality of life in patients with malignant esophageal Dysphagia. *The American journal of gastroenterology*. 2004;99(6):1044-1049.
25. Pickard AS, Jiang R, Lin HW, Rosenbloom S, Cella D. Using Patient-reported Outcomes to Compare Relative Burden of Cancer: EQ-5D and Functional Assessment of Cancer Therapy-General in Eleven Types of Cancer. *Clinical therapeutics*. 2016;38(4):769-777.
26. Zhou HJ, So JB, Yong WP, et al. Validation of the functional assessment of cancer therapy-gastric module for the Chinese population. *Health and quality of life outcomes*. 2012;10:145.
27. Yabroff KR, McNeel TS, Waldron WR, et al. Health limitations and quality of life associated with cancer and other chronic diseases by phase of care. *Medical care*. 2007;45(7):629-637.
28. Muller-Nordhorn J, Roll S, Bohmig M, et al. Health-related quality of life in patients with pancreatic cancer. *Digestion*. 2006;74(2):118-125.
29. Farkkila N, Sintonen H, Saarto T, et al. Health-related quality of life in colorectal cancer. *Colorectal disease : the official journal of the Association of Coloproctology of Great Britain and Ireland*. 2013;15(5):e215-222.
